# Supplementary material for: Bioactive Compounds from the Stems of Clausena lansium
Source: PubMed Central journal article supplement (PMC6149816; doi:10.3390/molecules22122226), 2017-12-14
Supplement: molecules-22-02226-s001.pdf [file molecules-22-02226-s001.pdf]

## Supporting information

# Bioactive Compounds from the stems of *Clausena lansium*

Jie Liu <sup>1,2</sup>, Chuang-Jun Li <sup>1</sup>, Yi-Qian Du <sup>1</sup>, Li Li <sup>1</sup>, Hua Sun <sup>1</sup>, Nai-Hong Chen <sup>1</sup> and Dong-Ming Zhang <sup>1\*</sup>

<sup>1</sup> State Key Laboratory of Bioactive Substance and Function of Natural Medicines, Institute of Materia Medica, Chinese Academy of Medical Sciences and Peking Union Medical College, Beijing 100050, People's Republic of China; znyspa.xf@163.com (J.L.); lichuangjun@imm.ac.cn (C.-J.L.); dyq08201105@163.com (Y. -Q. D.); annaleelin@imm.ac.cn (L.L.); sunhua@imm.ac.cn (H.S.); chennh@imm.ac.cn (N.-H.C.);

<sup>2</sup> Beijing Research Institute of Chinese Medicine, Beijing University of Chinese Medicine, Beijing 100029, People's Republic of China;

\* Correspondence: zhangdm@imm.ac.cn; Tel.: + 86-010-631-65227

## Index

|                                                                                                                                  |    |
|----------------------------------------------------------------------------------------------------------------------------------|----|
| Figure S1. The $^1\text{H}$ NMR Spectrum of compound <b>1</b> (400 MHz, $\text{DMSO-}d_6$ ) .....                                | 4  |
| Figure S2. The $^{13}\text{C}$ NMR Spectrum of compound <b>1</b> (100 MHz, $\text{DMSO-}d_6$ ) .....                             | 5  |
| Figure S3. The DEPT Spectrum of compound <b>1</b> .....                                                                          | 6  |
| Figure S4. The HSQC Spectrum of compound <b>1</b> .....                                                                          | 7  |
| Figure S5. The HMBC Spectrum of compound <b>1</b> .....                                                                          | 8  |
| Figure S6. The HRESIMS Spectrum of compound <b>1</b> .....                                                                       | 9  |
| Figure S7. The IR Spectrum of compound <b>1</b> .....                                                                            | 10 |
| Figure S8. The $^1\text{H}$ NMR Spectrum of compound <b>1a</b> (600 MHz, $\text{DMSO-}d_6$ ) .....                               | 11 |
| Figure S9. The $^{13}\text{C}$ NMR Spectrum of compound <b>1a</b> (150 MHz, $\text{DMSO-}d_6$ ) .....                            | 12 |
| Figure S10. Calculated ECD spectra of (8S) <b>1a</b> and (8R) <b>1a</b> and the experimental ECD of <b>1a</b> and <b>1</b> ..... | 13 |
| Figure S11. GC chromatogram of sugar motieties silylationed after acid hydrolysis of <b>1</b> .....                              | 14 |
| Figure S12. The $^1\text{H}$ NMR Spectrum of compound <b>2</b> (400 MHz, $\text{DMSO-}d_6$ ) .....                               | 15 |
| Figure S13. The $^{13}\text{C}$ NMR Spectrum of compound <b>2</b> (100 MHz, $\text{DMSO-}d_6$ ) .....                            | 16 |
| Figure S14. The DEPT Spectrum of compound <b>2</b> .....                                                                         | 17 |
| Figure S15. The HSQC Spectrum of compound <b>2</b> .....                                                                         | 18 |
| Figure S16. The $^1\text{H}$ , $^1\text{H}$ -COSY Spectrum of compound <b>2</b> .....                                            | 19 |
| Figure S17. The HMBC Spectrum of compound <b>2</b> .....                                                                         | 20 |
| Figure S18. The HRESIMS Spectrum of compound <b>2</b> .....                                                                      | 21 |
| Figure S19. The IR Spectrum of compound <b>2</b> .....                                                                           | 22 |
| Figure S20. The $^1\text{H}$ NMR Spectrum of compound <b>2a</b> (600 MHz, $\text{DMSO-}d_6$ ) .....                              | 23 |
| Figure S21. The $^{13}\text{C}$ NMR Spectrum of compound <b>2a</b> (150 MHz, $\text{DMSO-}d_6$ ) .....                           | 24 |
| Figure S22. GC chromatogram of sugar motiety silylationed after acid hydrolysis of <b>2</b> .....                                | 25 |
| Figure S23. The $^1\text{H}$ NMR Spectrum of compound <b>3</b> (400 MHz, $\text{DMSO-}d_6$ ) .....                               | 26 |
| Figure S24. The $^{13}\text{C}$ NMR Spectrum of compound <b>3</b> (100 MHz, $\text{DMSO-}d_6$ ) .....                            | 27 |
| Figure S25. The HSQC Spectrum of compound <b>3</b> .....                                                                         | 28 |
| Figure S26. The HMBC Spectrum of compound <b>3</b> .....                                                                         | 29 |
| Figure S27. The HRESIMS Spectrum of compound <b>3</b> .....                                                                      | 30 |
| Figure S28. The IR Spectrum of compound <b>3a</b> .....                                                                          | 31 |
| Figure S29. The IR Spectrum of compound <b>3b</b> .....                                                                          | 32 |
| Figure S30. The experimental CD Spectrum of compound <b>3a</b> and <b>3b</b> in MeOH .....                                       | 33 |

|                                                                                                                 |    |
|-----------------------------------------------------------------------------------------------------------------|----|
| Figure S31. The Mo <sub>2</sub> (OAc) <sub>4</sub> Induced CD Spectrum of compound <b>3a</b> .....              | 34 |
| Figure S32. The Mo <sub>2</sub> (OAc) <sub>4</sub> Induced CD Spectrum of compound <b>3b</b> .....              | 35 |
| Figure S33. The <sup>1</sup> H NMR Spectrum of compound <b>4</b> (600 MHz, DMSO- <i>d</i> <sub>6</sub> ) .....  | 36 |
| Figure S34. The <sup>13</sup> C NMR Spectrum of compound <b>4</b> (150 MHz, DMSO- <i>d</i> <sub>6</sub> ) ..... | 37 |
| Figure S35. The DEPT Spectrum of compound <b>4</b> .....                                                        | 38 |
| Figure S36. The HSQC Spectrum of compound <b>4</b> .....                                                        | 39 |
| Figure S37. The <sup>1</sup> H, <sup>1</sup> H-COSY Spectrum of compound <b>4</b> .....                         | 40 |
| Figure S38. The HMBC Spectrum of compound <b>4</b> .....                                                        | 41 |
| Figure S39. The HRESIMS Spectrum of compound <b>4</b> .....                                                     | 42 |
| Figure S40. The IR Spectrum of compound <b>4</b> .....                                                          | 43 |
| Figure S41. The CD Spectrum of compound <b>4</b> .....                                                          | 44 |
| Figure S42. The <sup>1</sup> H NMR Spectrum of compound <b>5</b> (600 MHz, DMSO- <i>d</i> <sub>6</sub> ) .....  | 45 |
| Figure S43. The <sup>13</sup> C NMR Spectrum of compound <b>5</b> (150 MHz, DMSO- <i>d</i> <sub>6</sub> ) ..... | 46 |
| Figure S44. The DEPT Spectrum of compound <b>5</b> .....                                                        | 47 |
| Figure S45. The HSQC Spectrum of compound <b>5</b> .....                                                        | 48 |
| Figure S46. The <sup>1</sup> H, <sup>1</sup> H-COSY Spectrum of compound <b>5</b> .....                         | 49 |
| Figure S47. The HMBC Spectrum of compound <b>5</b> .....                                                        | 50 |
| Figure S48. The HRESIMS Spectrum of compound <b>5</b> .....                                                     | 51 |
| Figure S49. IR Spectrum of compound <b>5</b> .....                                                              | 52 |
| Figure S50. CD Spectrum of compound <b>5</b> .....                                                              | 53 |

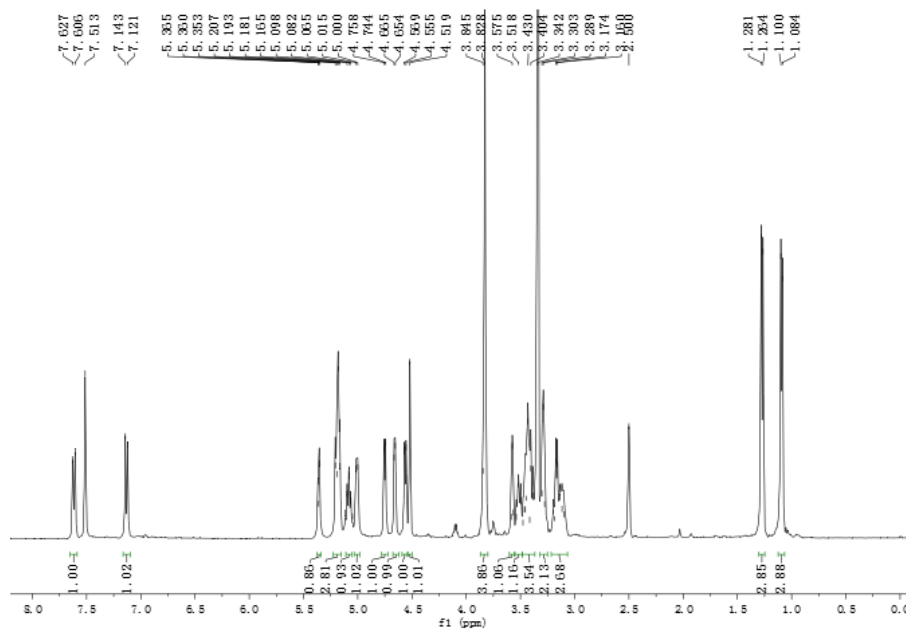

Figure S1. The  $^1\text{H}$  NMR Spectrum of compound 1 (400 MHz,  $\text{DMSO}-d_6$ )

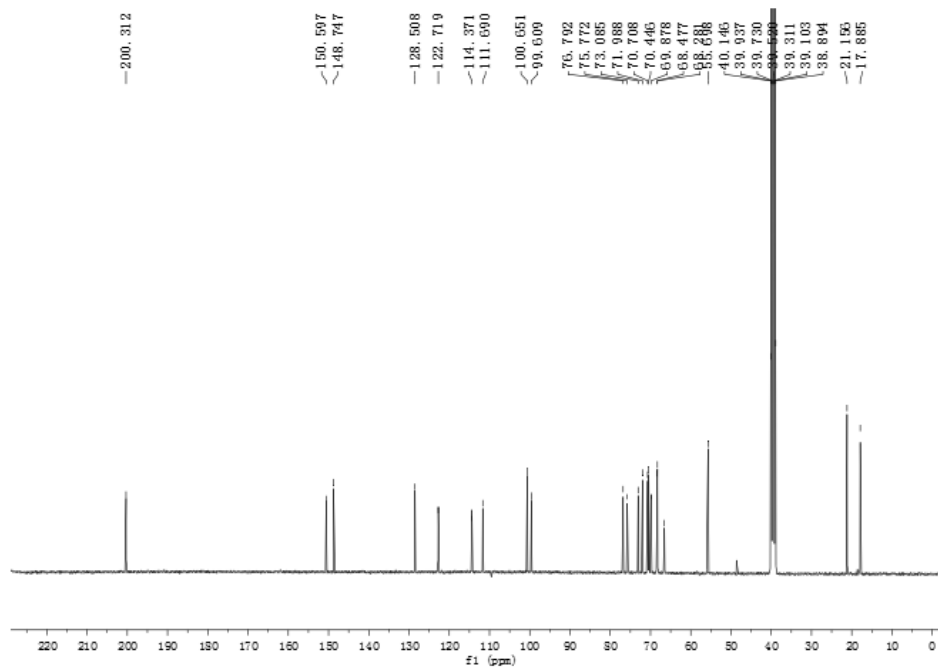

Figure S2. The  $^{13}\text{C}$  NMR Spectrum of compound 1 (100 MHz,  $\text{DMSO-}d_6$ )

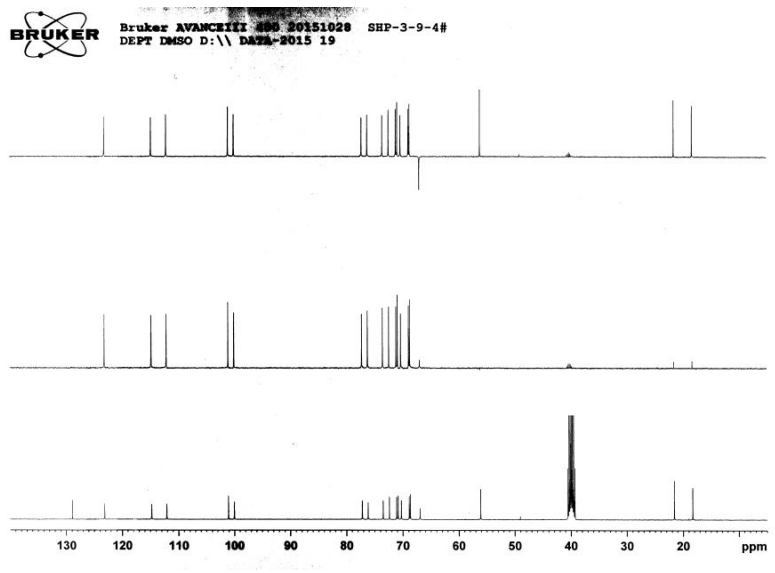

Figure S3. The DEPT Spectrum of compound 1

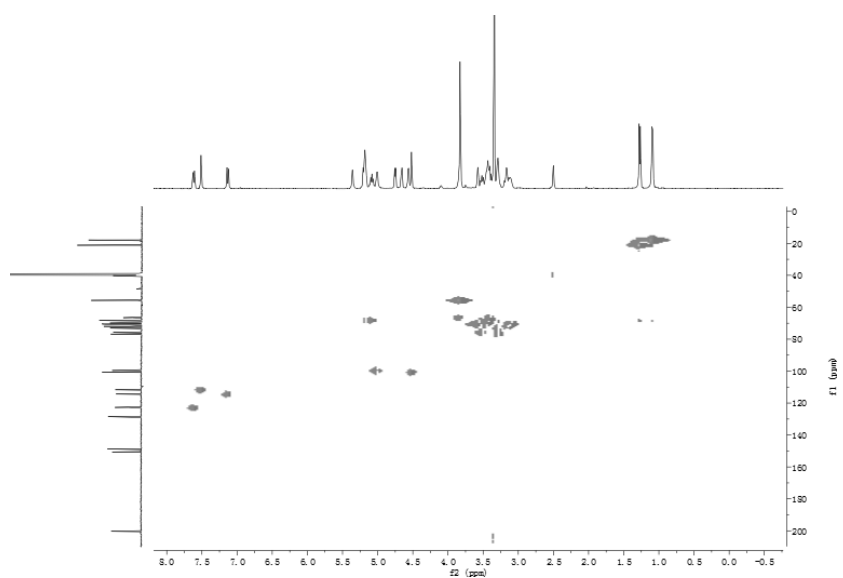

**Figure S4. The HSQC Spectrum of compound 1**

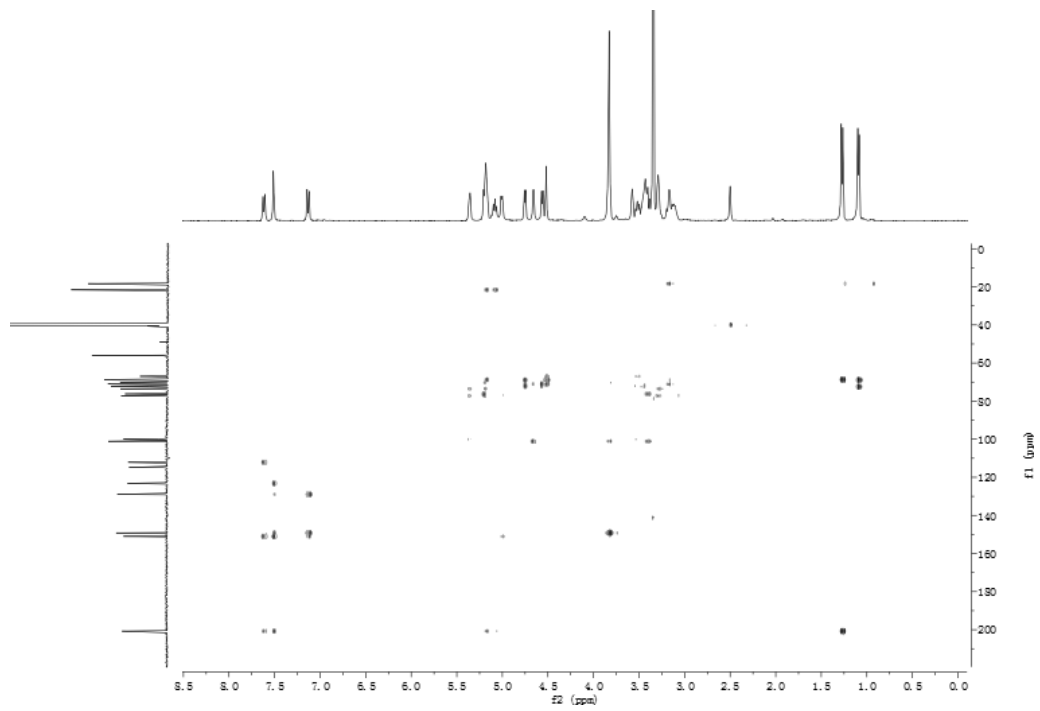

**Figure S5. The HMBC Spectrum of compound 1**



MS Formula Results: + Scan (3.658 min) Sub (2016031801.d)

| m/z      | Ion                 | Formula        | Abundance |
|----------|---------------------|----------------|-----------|
| 527.1731 | (M+Na) <sup>+</sup> | C22 H32 Na O13 | 55974.3   |

  

| Best | Formula (M)   | Ion Formula      | Score | Cross Sco | Mass     | Calc Mass | Calc m/z | Diff (ppm) | Abs Diff (ppm) | Mass Match | Abund Match |
|------|---------------|------------------|-------|-----------|----------|-----------|----------|------------|----------------|------------|-------------|
| ✓    | C22 H32 O13   | C22 H32 Na O13   | 99.93 |           | 504.1839 | 504.1843  | 527.1735 | 0.82       | 0.82           | 99.98      | 99.93       |
|      | C35 H24 N2 O2 | C35 H24 N2 Na O2 | 96.5  |           | 504.1839 | 504.1838  | 527.173  | -0.2       | 0.2            | 100        | 87.95       |

Figure S6. The HRESIMS Spectrum of compound 1

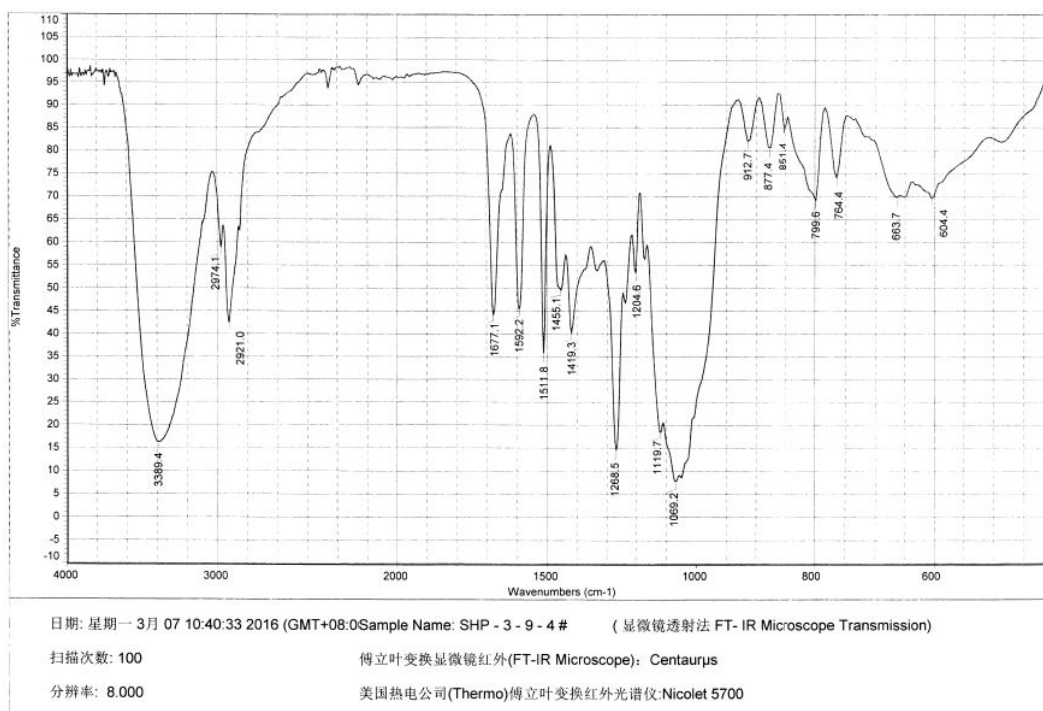

Figure S7. The IR Spectrum of compound 1

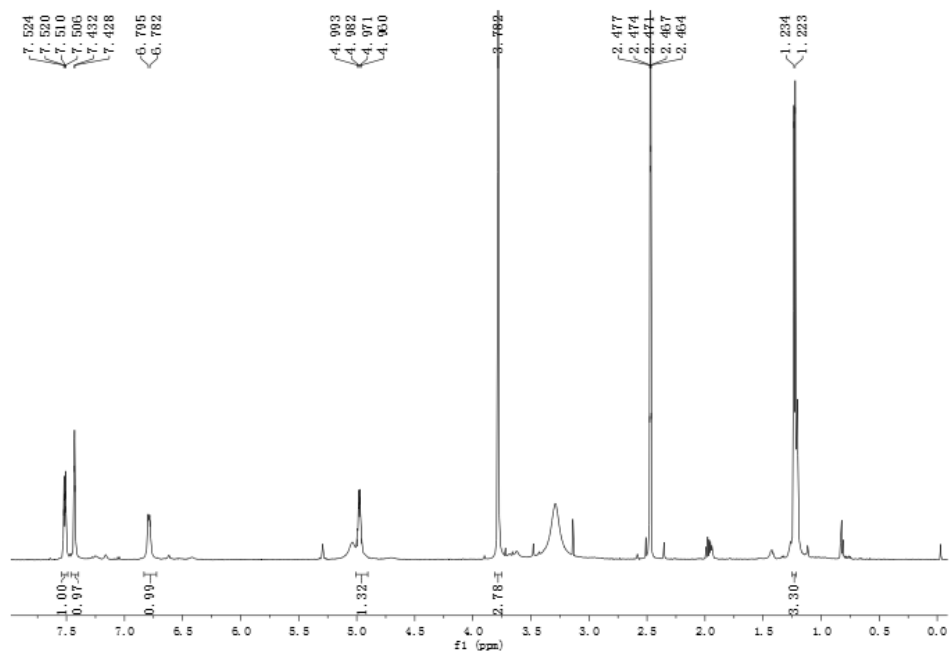

**Figure S8.** The  $^1\text{H}$  NMR Spectrum of compound 1a (600 MHz,  $\text{DMSO-}d_6$ )

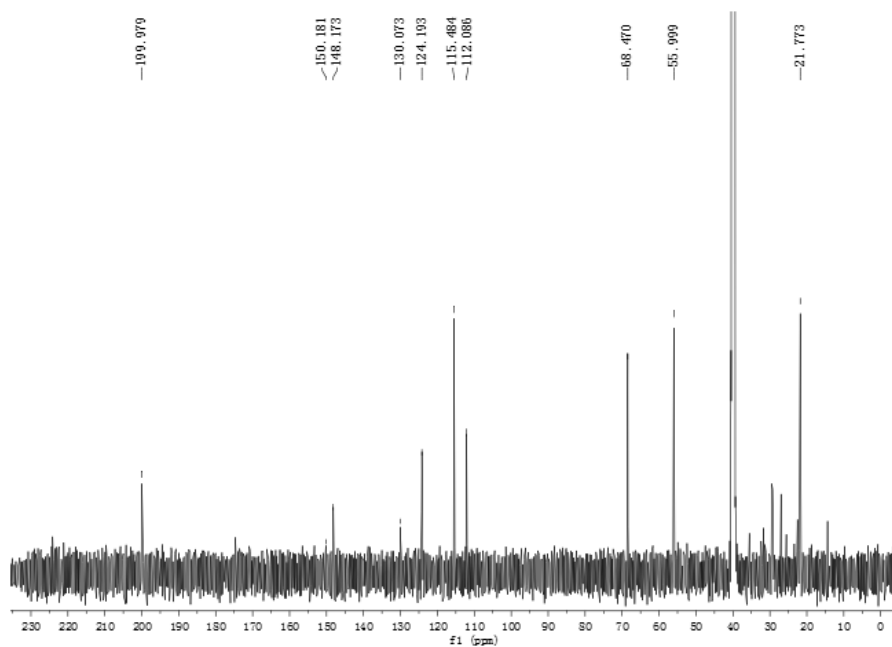

**Figure S9.** The  $^{13}\text{C}$  NMR Spectrum of compound 1a (150 MHz, DMSO- $d_6$ )

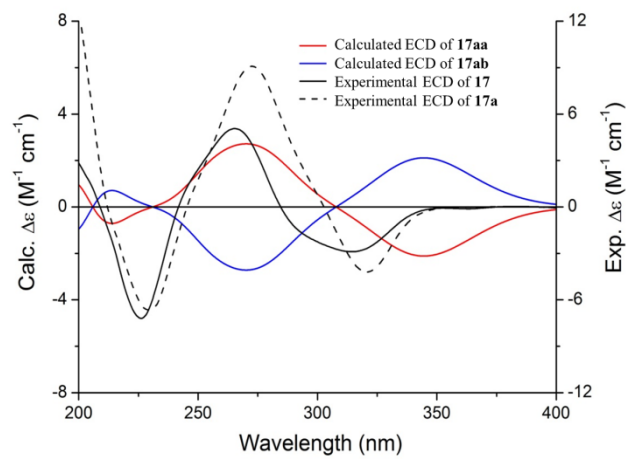

**Figure S10. Calculated ECD spectra of (8S)1a and (8R)1a and the experimental ECD of 1a and 1**

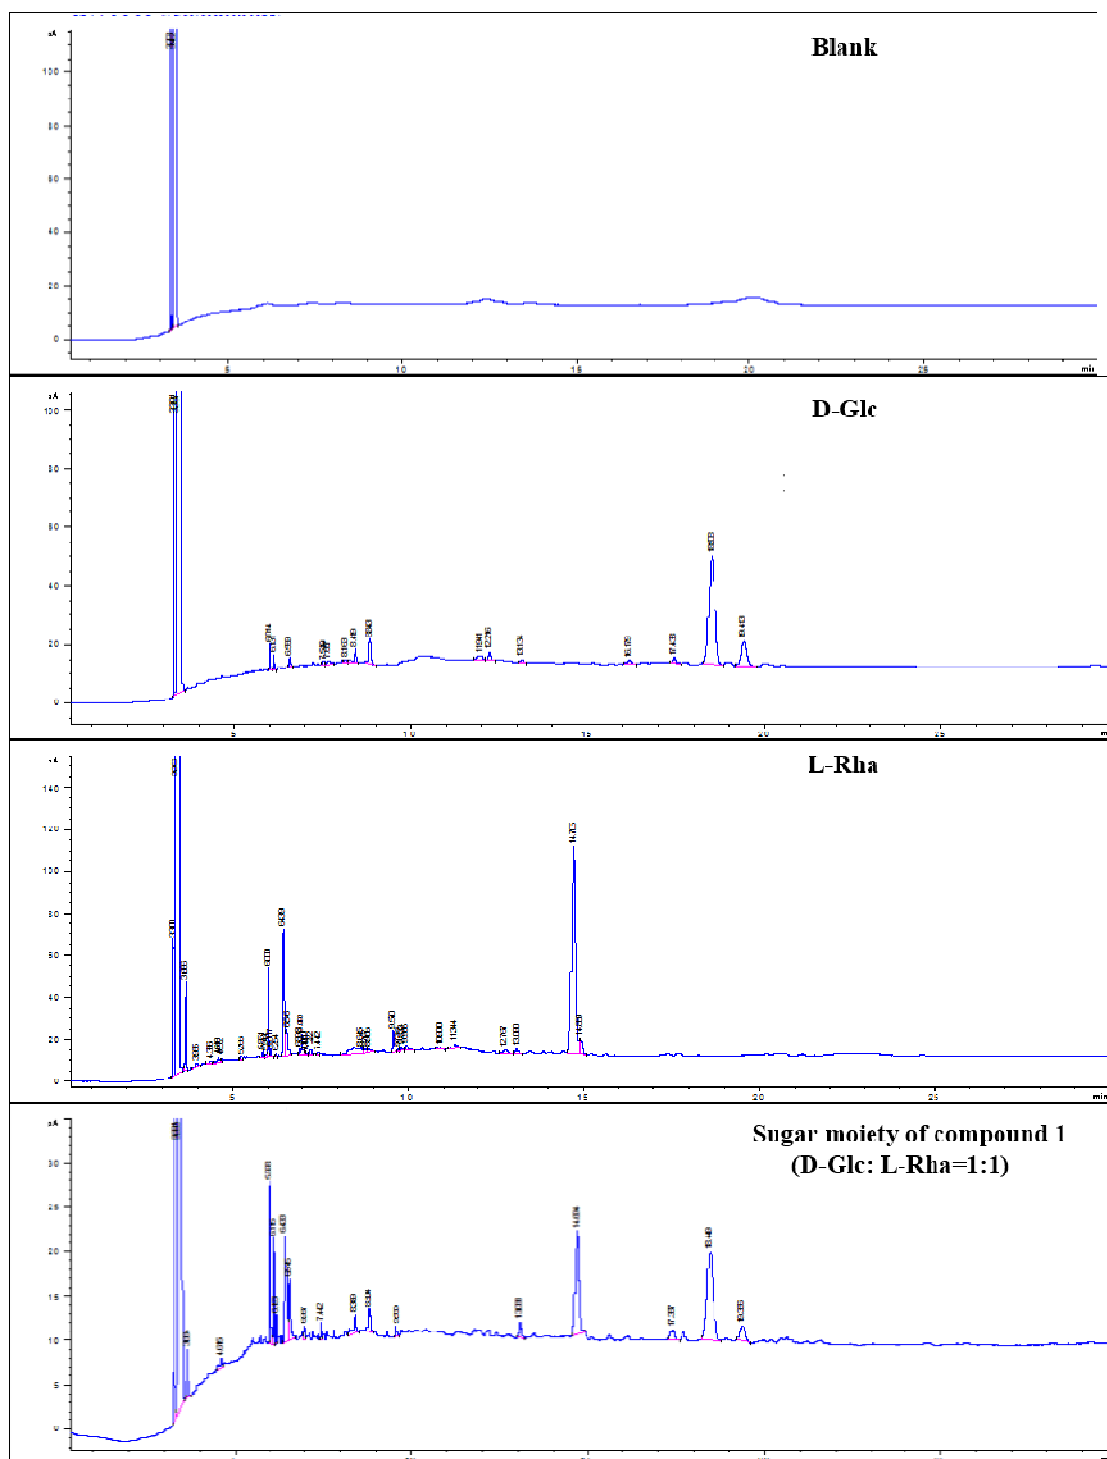

Figure S11. GC chromatogram of sugar moieties silylated after acid hydrolysis of 1

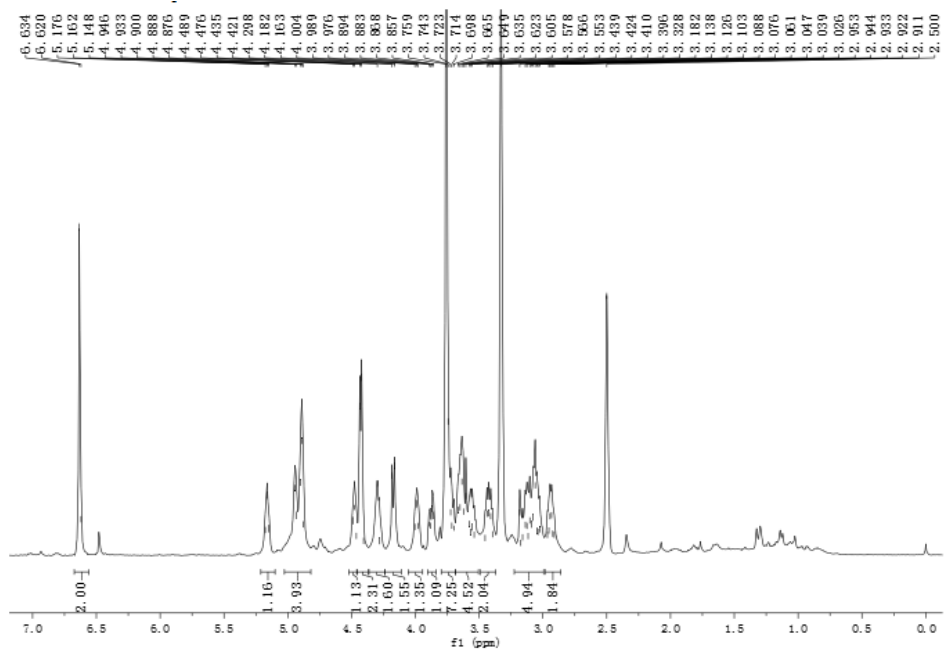

Figure S12. The  $^1\text{H}$  NMR Spectrum of compound 2 (400 MHz,  $\text{DMSO-}d_6$ )

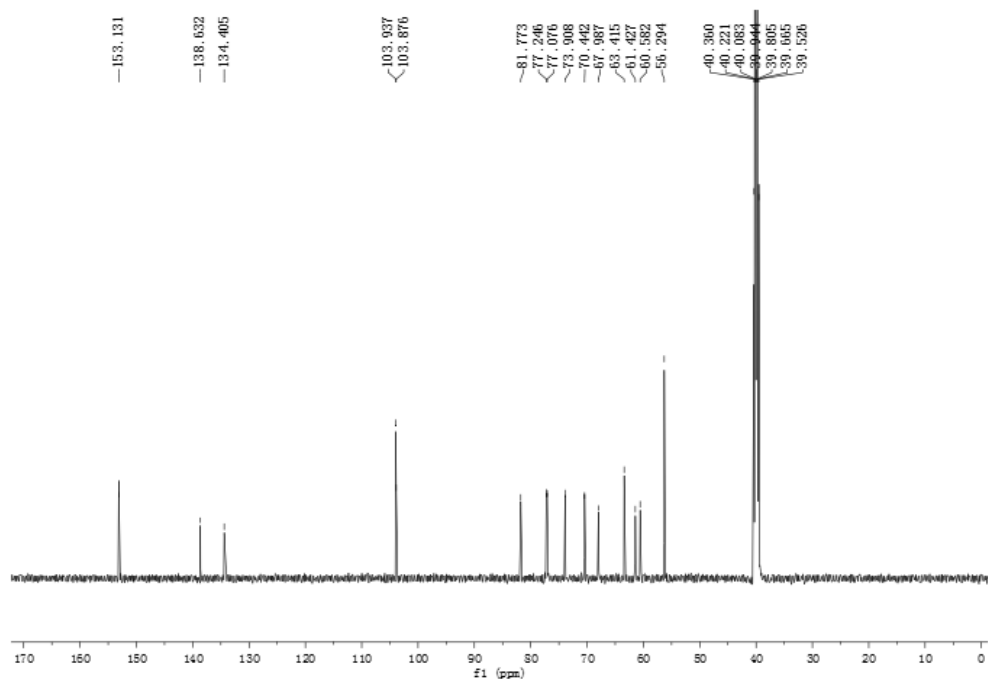

**Figure S13.** The  $^{13}\text{C}$  NMR Spectrum of compound 2 (100 MHz,  $\text{DMSO-}d_6$ )



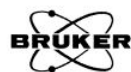

Bruker AVANCEIII 400 20151023 SHP-3-5-2#  
DEPT DMF D:\\ DATA-2015 38

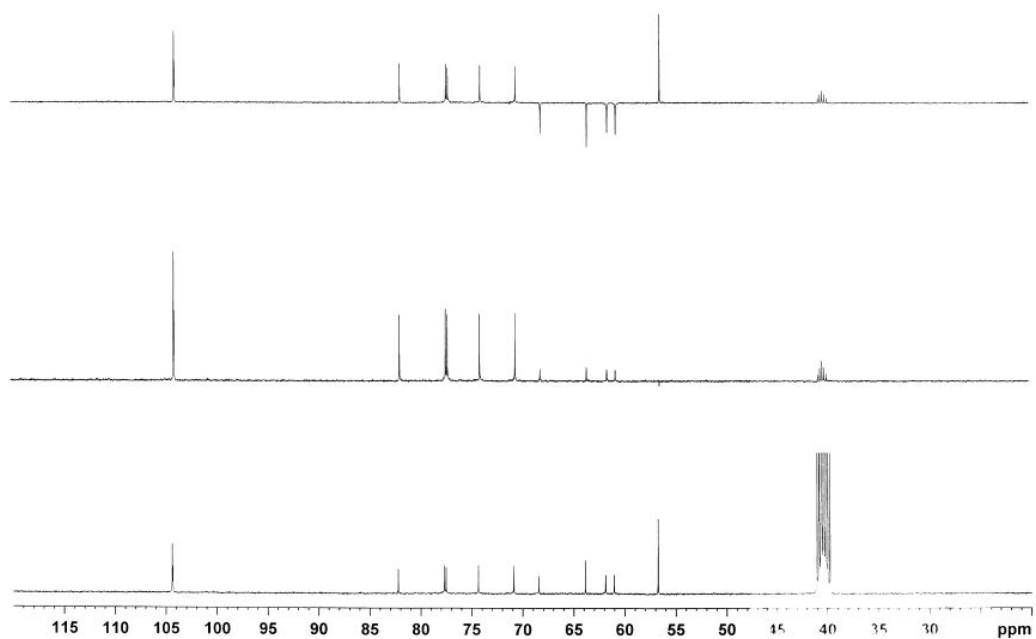

Figure S14. The DEPT Spectrum of compound 2

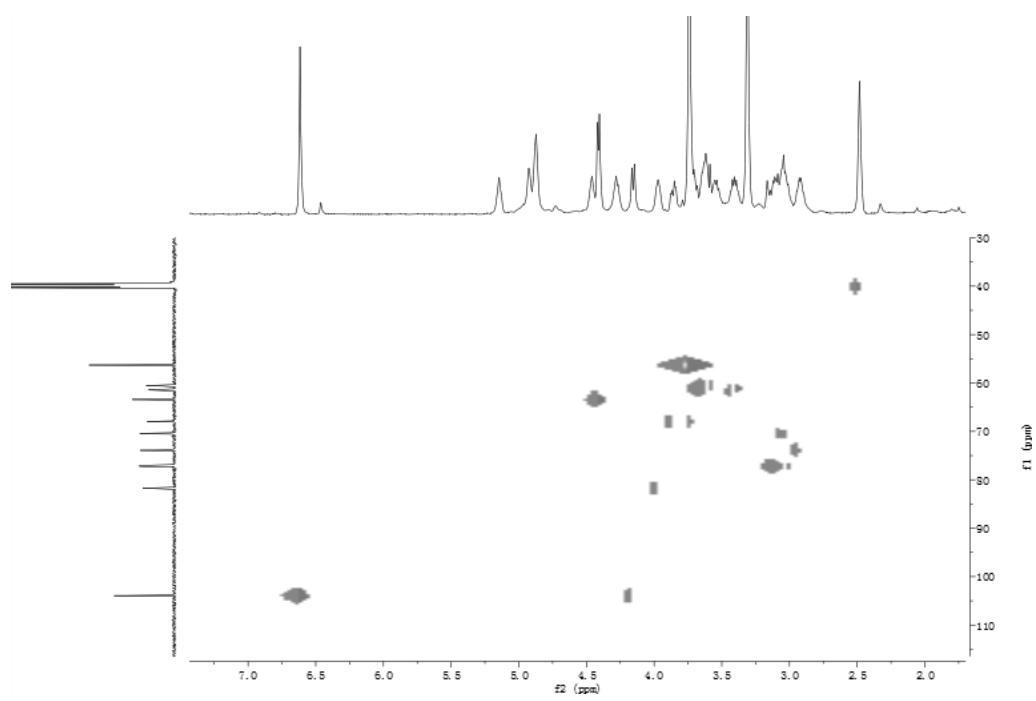

**Figure S15. The HSQC Spectrum of compound 2**

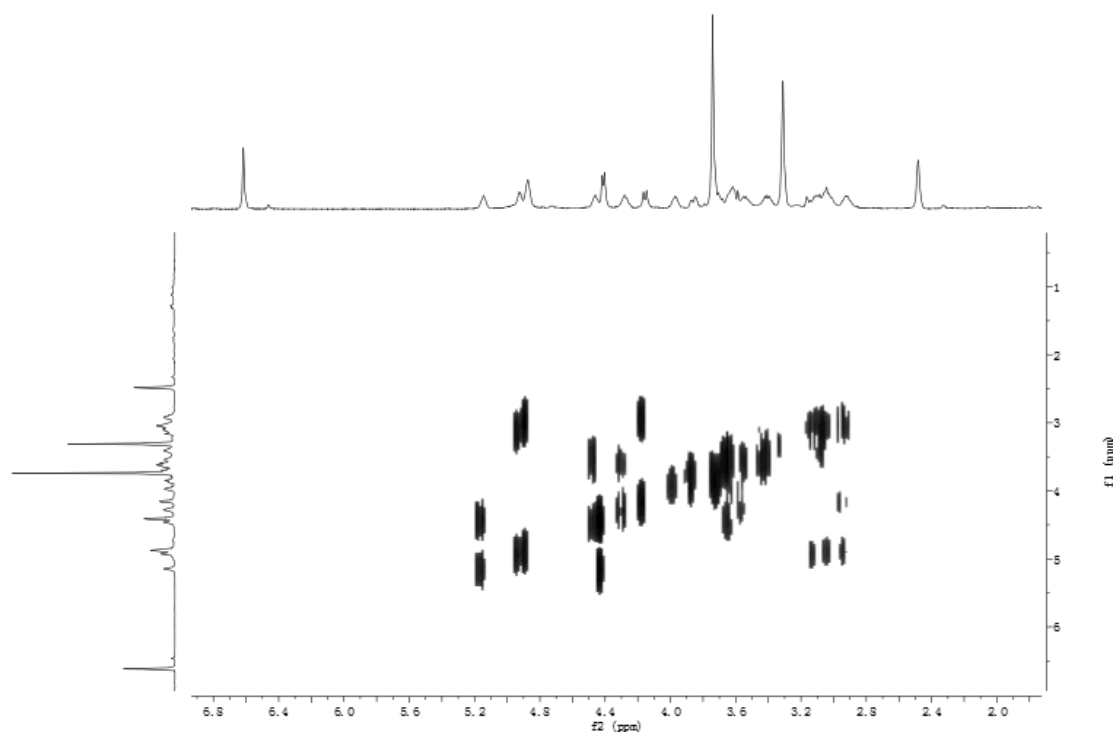

**Figure S16.** The  $^1\text{H}$ ,  $^1\text{H}$ -COSY Spectrum of compound 2

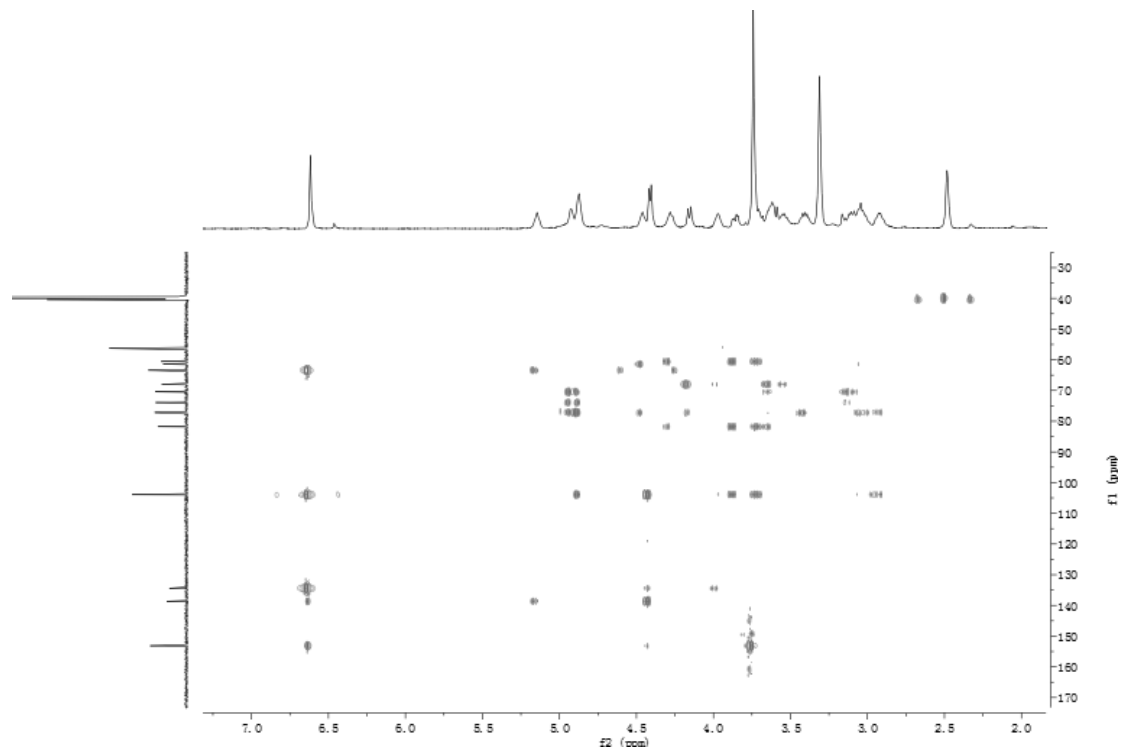

**Figure S17.** The HMBC Spectrum of compound 2

MS Formula Results: + Scan (3.831 min) Sub (2016031802.d)

| m/z      | Ion                 | Formula        | Abundance |
|----------|---------------------|----------------|-----------|
| 443.1532 | (M+Na) <sup>+</sup> | C18 H28 Na O11 | 355264.8  |

  

| Best | Formula (M) | Ion Formula    | Score | Cross Sco | Mass    | Calc Mass | Calc m/z | Diff (ppm) | Abs Diff (ppm) | Mass Match | Abund Match | Spacing Match | DBE |
|------|-------------|----------------|-------|-----------|---------|-----------|----------|------------|----------------|------------|-------------|---------------|-----|
| ✓    | C18 H28 O11 | C18 H28 Na O11 | 99.89 |           | 420.164 | 420.1632  | 443.1524 | -1.95      | 1.95           | 99.89      | 99.89       | 99.9          | 5   |
|      | C31 H20 N2  | C31 H20 N2 Na  | 94.87 |           | 420.164 | 420.1626  | 443.1519 | -3.17      | 3.17           | 99.7       | 82.71       | 99.81         | 23  |

Figure S18. The HRESIMS Spectrum of compound 2

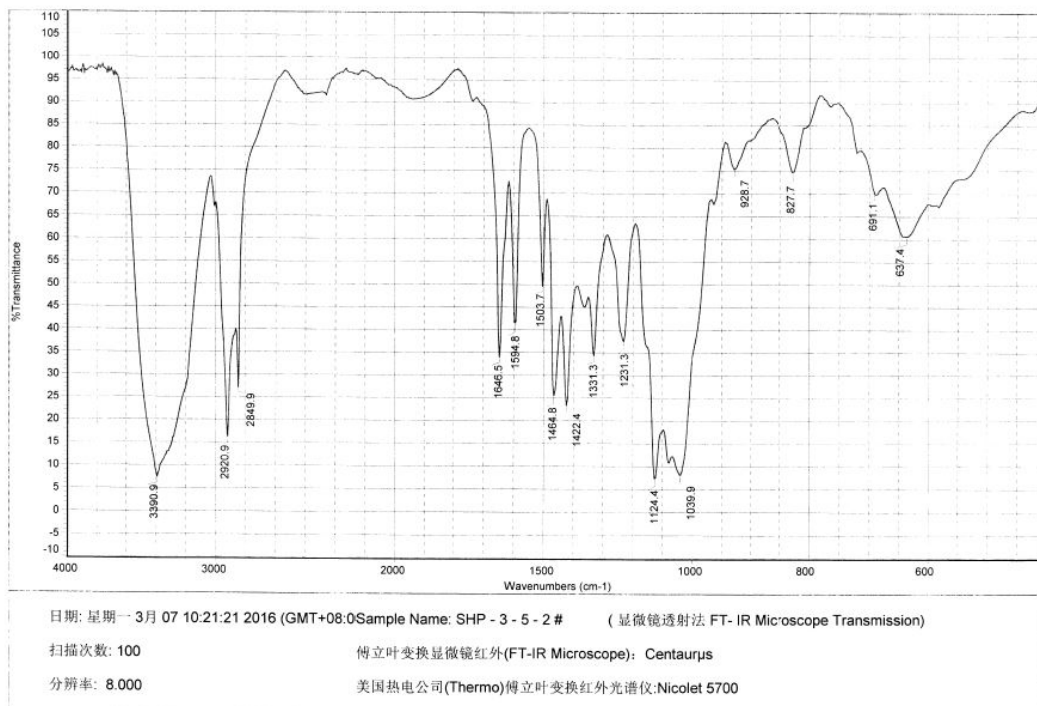

Figure S19. The IR Spectrum of compound 2

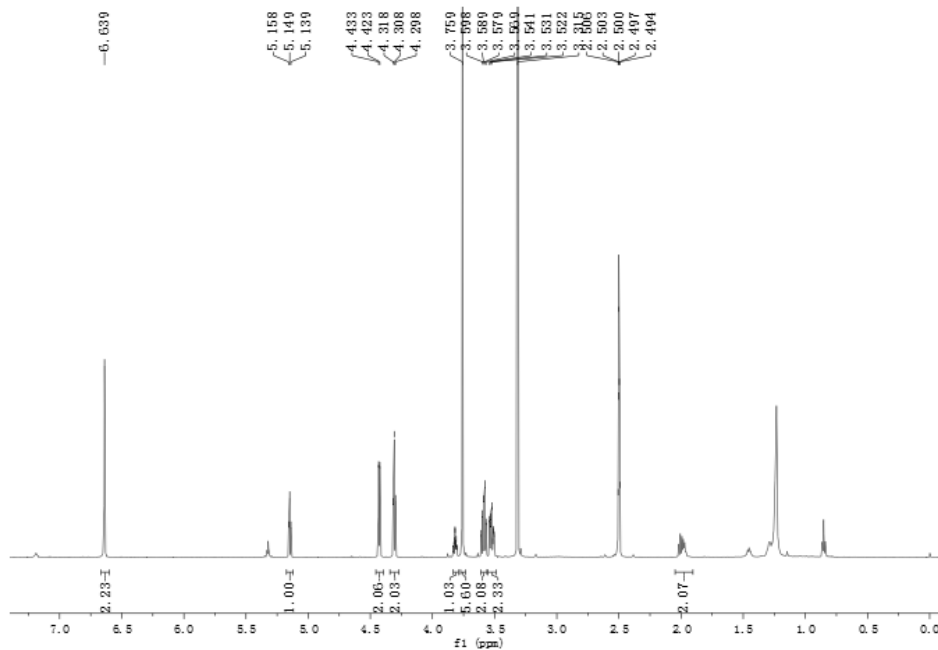

Figure S20. The  $^1\text{H}$  NMR Spectrum of compound 2a (600 MHz,  $\text{DMSO-}d_6$ )

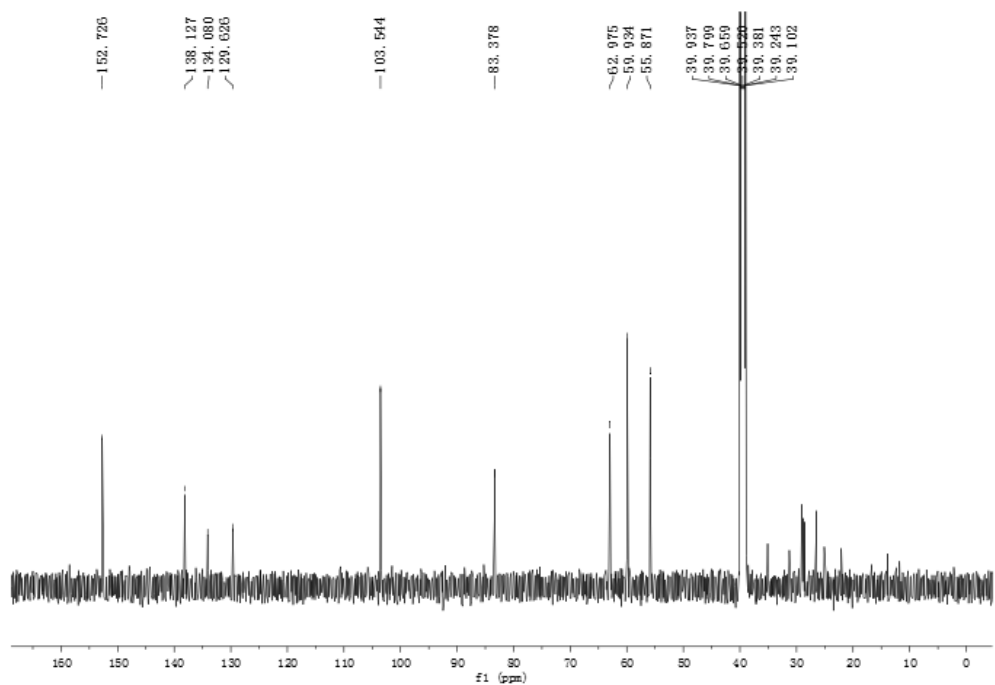

Figure S21. The  $^{13}\text{C}$  NMR Spectrum of compound 2a (150 MHz,  $\text{DMSO-}d_6$ )



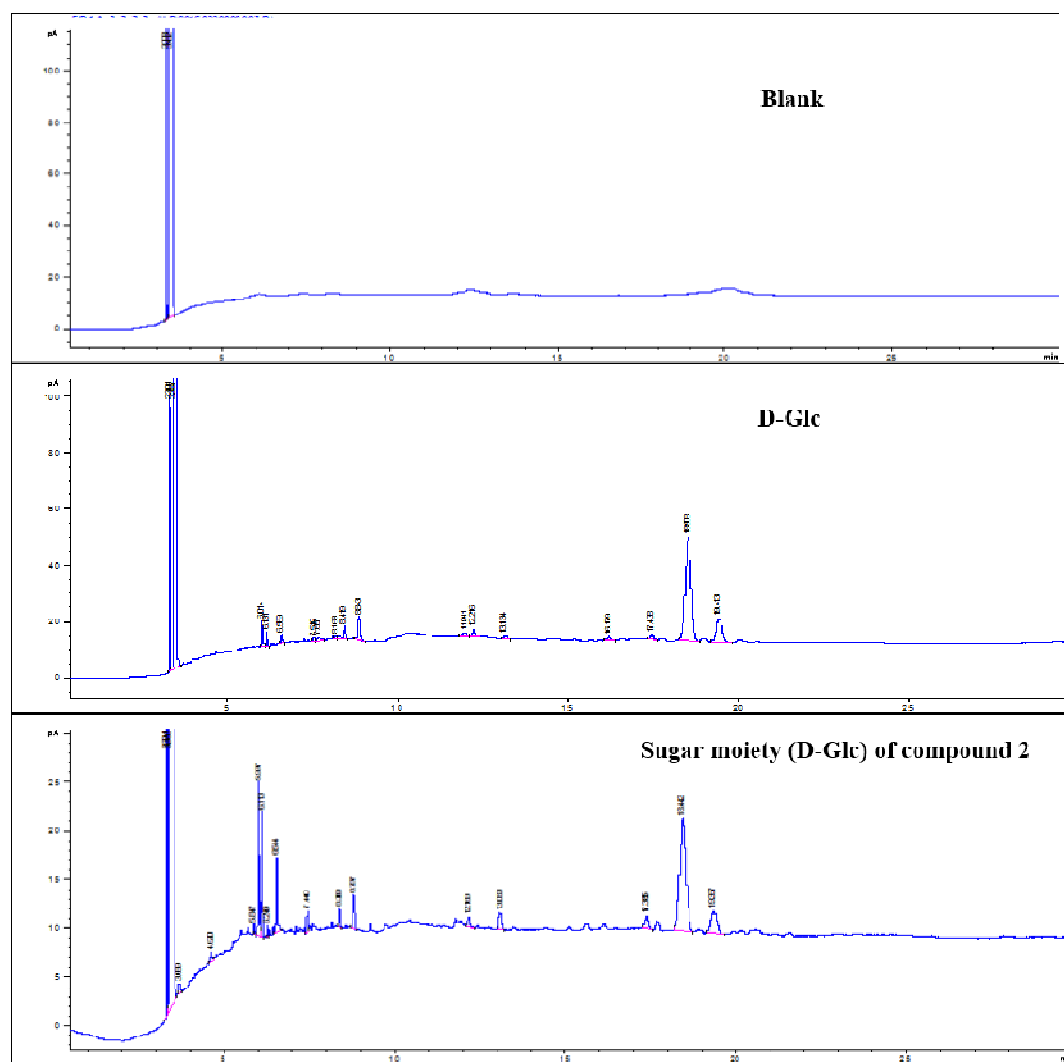

**Figure S22. GC chromatogram of sugar moiety silylated after acid hydrolysis of 2**

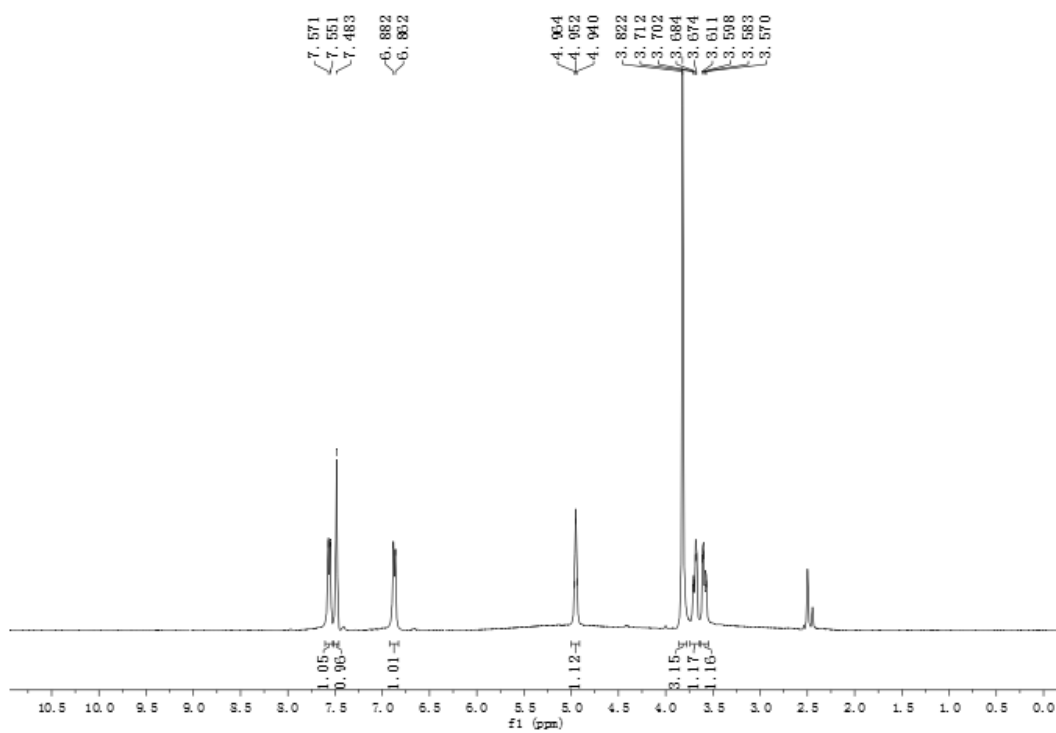

Figure S23. The  $^1\text{H}$  NMR Spectrum of compound 3 (400 MHz,  $\text{DMSO-}d_6$ )

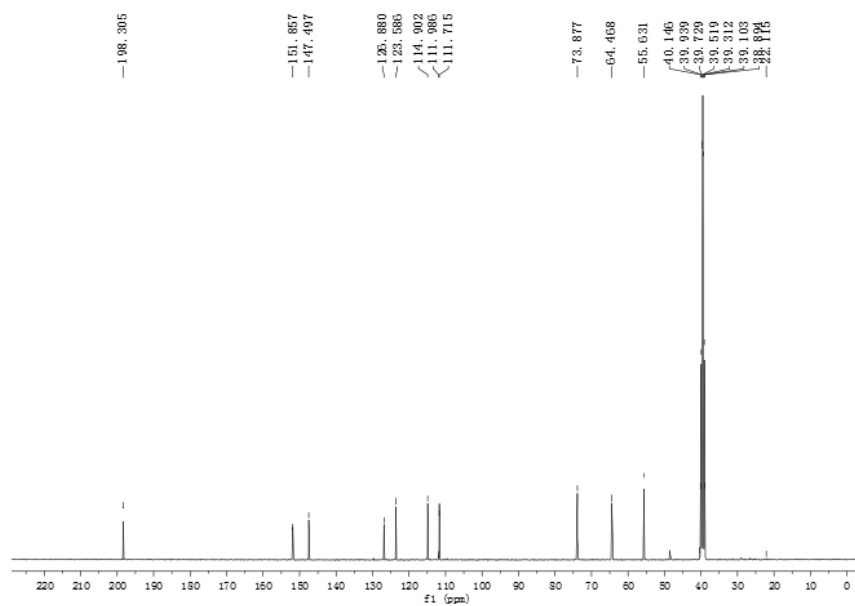

Figure S24. The  $^{13}\text{C}$  NMR Spectrum of compound 3 (100 MHz,  $\text{DMSO-}d_6$ )

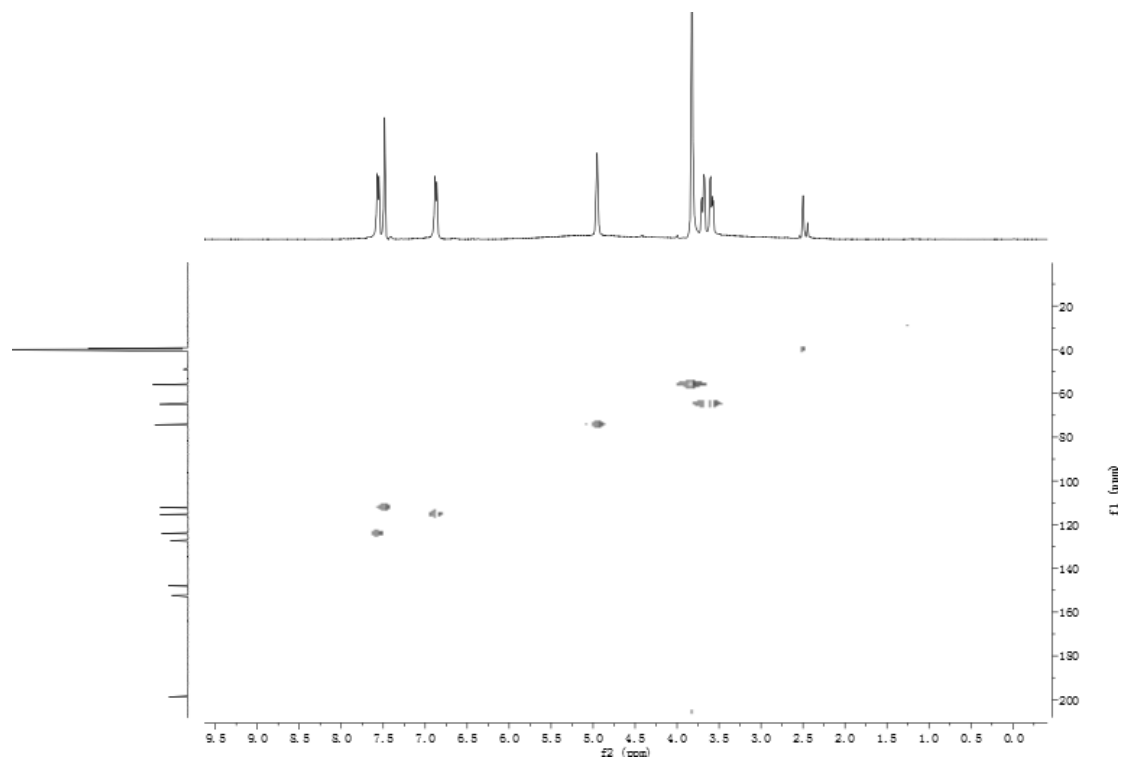

**Figure S25. The HSQC Spectrum of compound 3**

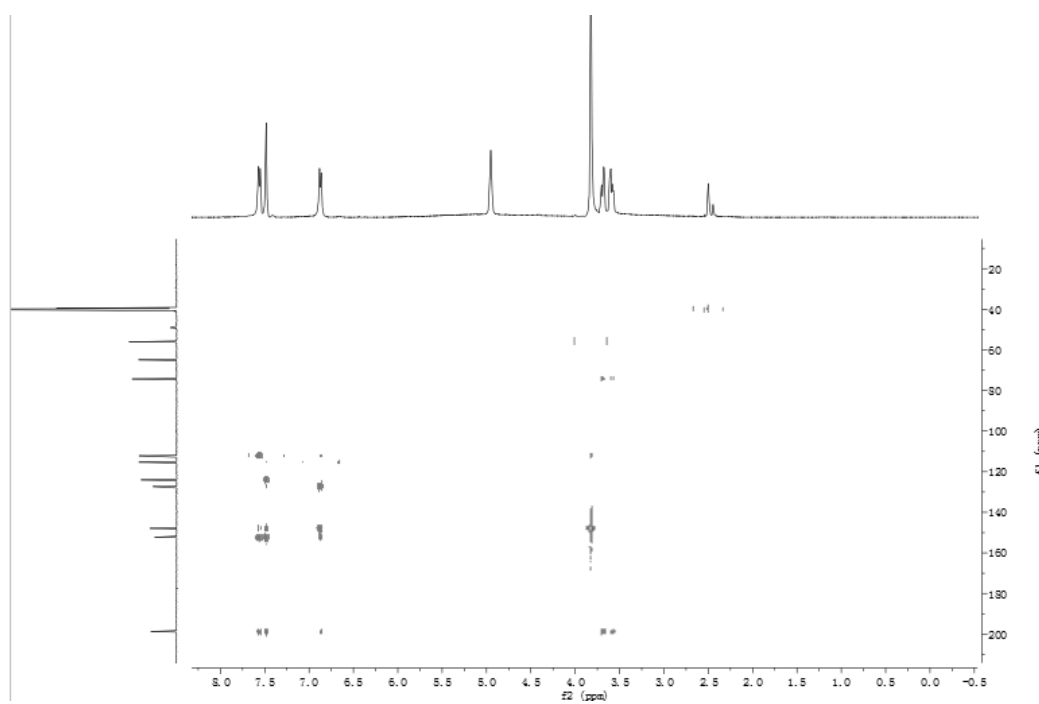

**Figure S26. The HMBC Spectrum of compound 3**

MS Formula Results: + Scan (1.789 min) Sub (2016031803.d)

| m/z      | Ion                 | Formula                                          | Abundance |
|----------|---------------------|--------------------------------------------------|-----------|
| 235.0573 | (M+Na) <sup>+</sup> | C <sub>10</sub> H <sub>12</sub> NaO <sub>5</sub> | 76301.2   |

  

| Best | Formula (M)                                    | Ion Formula                                      | Score | Cross Sco | Mass     | Calc Mass | Calc m/z | Diff (ppm) | Abs Diff (ppm) | Mass Match | Abund Match | Spacing Match | DBE |
|------|------------------------------------------------|--------------------------------------------------|-------|-----------|----------|-----------|----------|------------|----------------|------------|-------------|---------------|-----|
| ✓    | C <sub>10</sub> H <sub>12</sub> O <sub>5</sub> | C <sub>10</sub> H <sub>12</sub> NaO <sub>5</sub> | 99.92 |           | 212.0681 | 212.0685  | 235.0577 | 1.83       | 1.83           | 99.92      | 99.88       | 99.95         | 5   |

Figure S27. The HRESIMS Spectrum of compound 3

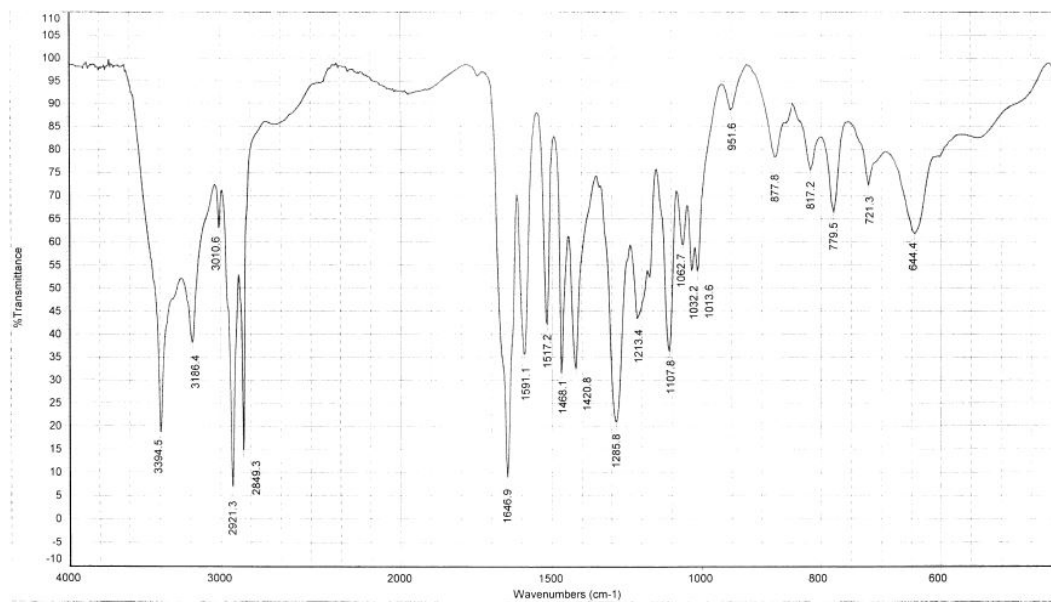

日期: 星期一 3月 07 10:54:50 2016 (GMT+08:0) Sample Name: SHP - 11 - 1# - 1# (显微镜透射法 FT-IR Microscope Transmission)

扫描次数: 100

傅立叶变换显微镜红外 (FT-IR Microscope): Centaurus

分辨率: 8.000

美国热电公司 (Thermo) 傅立叶变换红外光谱仪: Nicolet 5700

**Figure S28. The IR Spectrum of compound 3a**

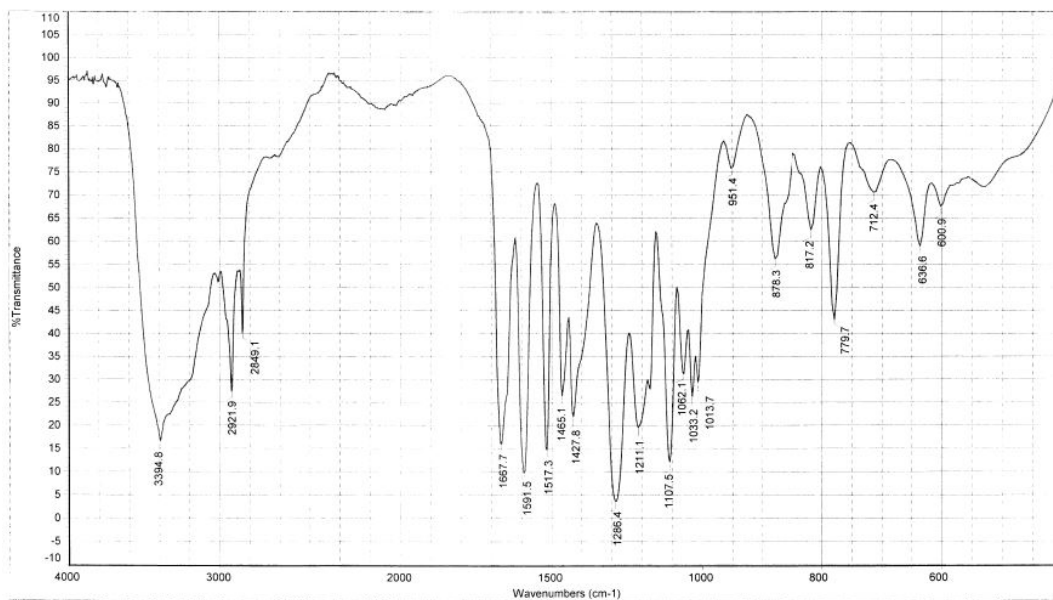

日期: 星期一 3月 07 10:47:33 2016 (GMT+08:00) Sample Name: SHP - 11 - 1# - 2# (显微镜透射法 FT- IR Microscope Transmission)

扫描次数: 100

傅立叶变换显微镜红外(FT-IR Microscope): Centaurus

分辨率: 8.000

美国热电公司(Thermo)傅立叶变换红外光谱仪:Nicolet 5700

**Figure S29. The IR Spectrum of compound 3b**



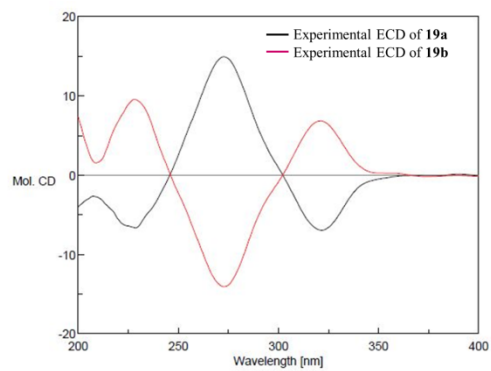

**Figure S30. The experimental CD Spectrum of compound 3a and 3b in**

**MeOH**

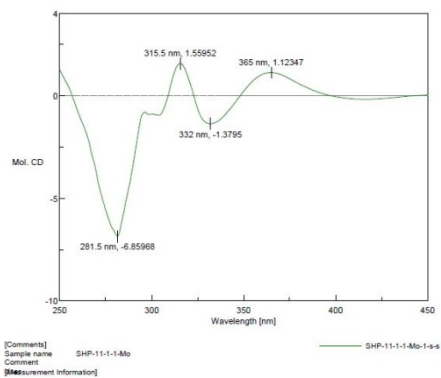

**Figure S31. The  $\text{Mo}_2(\text{OAc})_4$  Induced CD Spectrum of compound 3a**

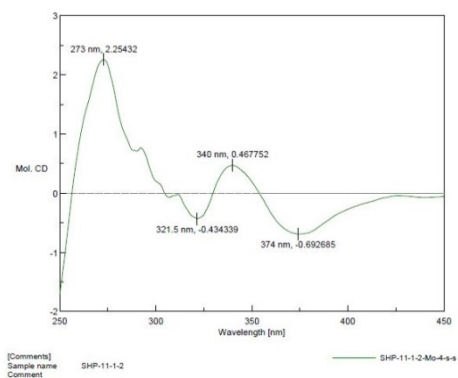

**Figure S32. The  $\text{Mo}_2(\text{OAc})_4$  Induced CD Spectrum of compound 3b**

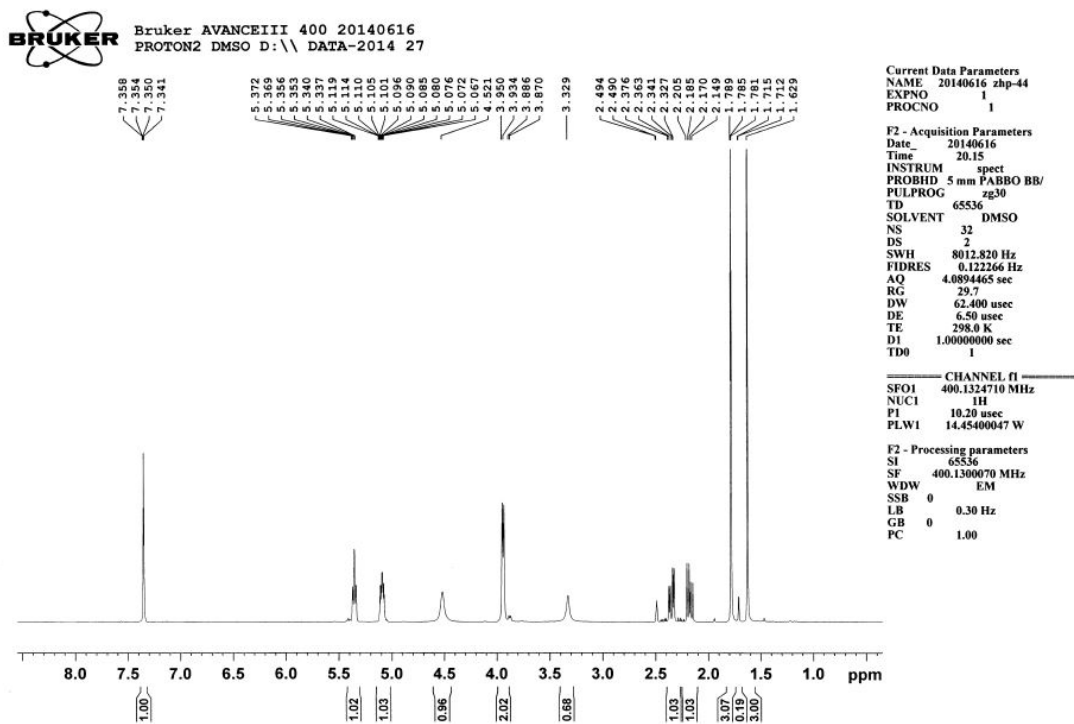

Figure S33. The  $^1\text{H}$  NMR Spectrum of compound 4 (600 MHz,  $\text{DMSO-}d_6$ )

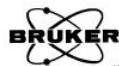

Bruker AVANCEIII 400 20140604  
C13 DMSO D:\ DATA-2014 13

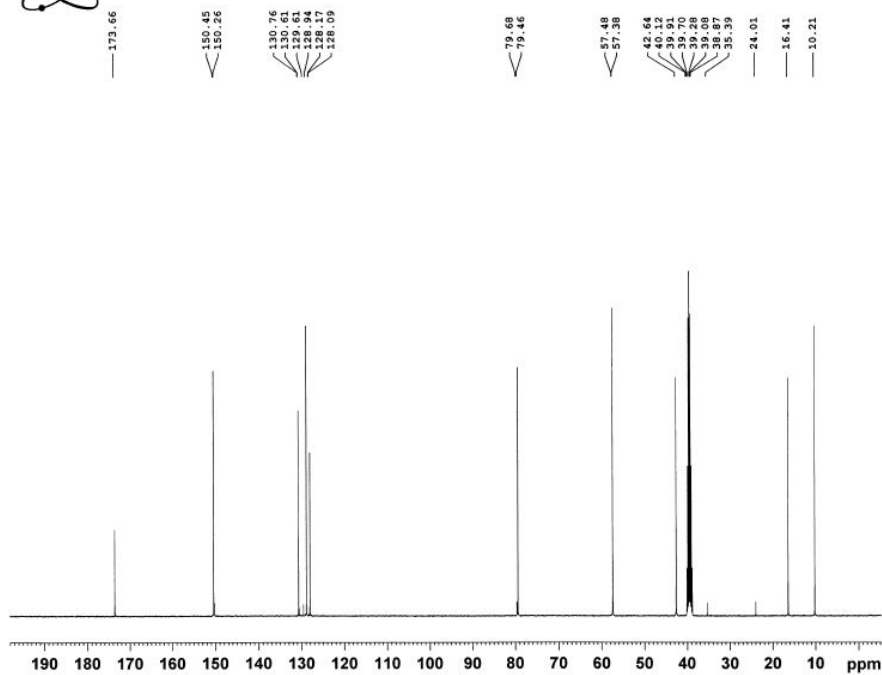

Current Data Parameters  
NAME 20140604 zhp-44  
EXPNO 1  
PROCNO 1

F2 - Acquisition Parameters  
Date\_ 20140605  
Time 16.10  
INSTRUM spect  
PROBHD 5 mm F4BBO BB/  
PULPROG zgpg30  
TD 65536  
SOLVENT DMSO  
NS 2568  
DS 4  
SWH 24038.461 Hz  
FIDRES 0.366798 Hz  
AQ 1.3631488 sec  
RG 194.76  
DW 20.800 usec  
DE 6.50 usec  
TE 298.1 K  
D1 1.00000000 sec  
D11 0.03000000 sec  
TD0 400

==== CHANNEL f1 =====  
SFO1 100.6238345 MHz  
NUC1 13C  
P1 10.00 usec  
PLW1 70.00000000 W

==== CHANNEL f2 =====  
SFO2 400.1316005 MHz  
NUC2 1H  
CPDPRG2 waltz16  
PCPD2 80.00 usec  
PLW2 14.45400047 W  
PLW12 0.23497000 W  
PLW13 0.15038000 W

F2 - Processing parameters  
SI 32768  
SF 100.6128163 MHz  
WDW EM  
SSB 0  
LB 1.00 Hz  
GB 0  
PC 1.40

Figure S34. The  $^{13}\text{C}$  NMR Spectrum of compound 4 (150 MHz,  $\text{DMSO-}d_6$ )

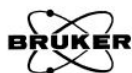

Bruker AVANCEIII 400 20140604 ZHP-44  
DEPT DMSO D:\ DATA-2014 13

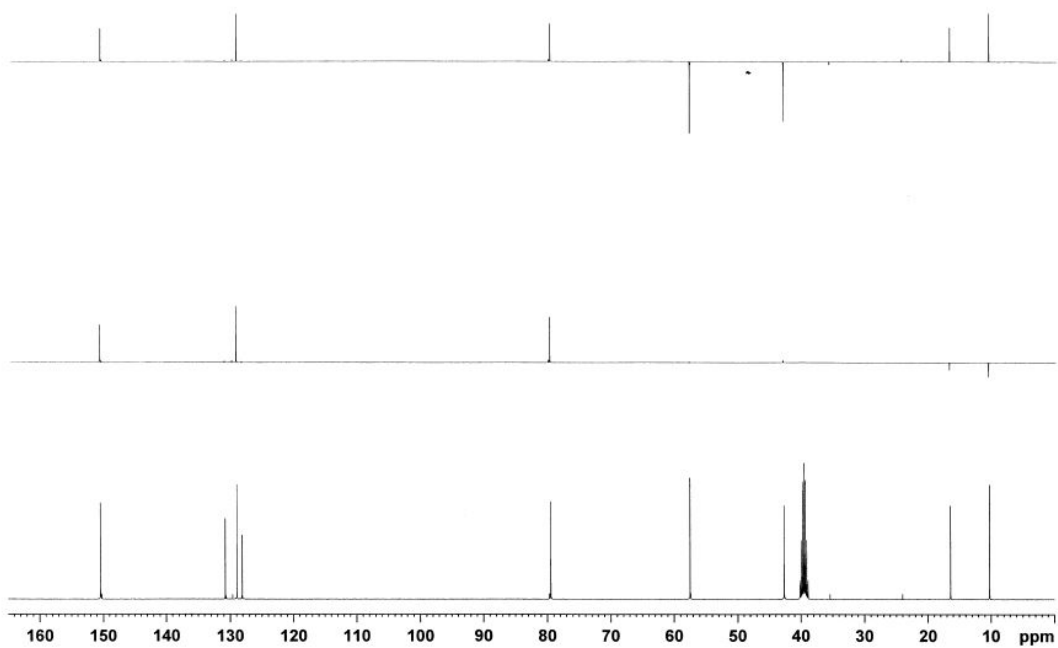

Figure S35. The DEPT Spectrum of compound 4

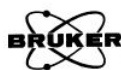

Bruker AVANCEIII 400 20140616  
HSQC DMSO D:\ DATA-2014 27

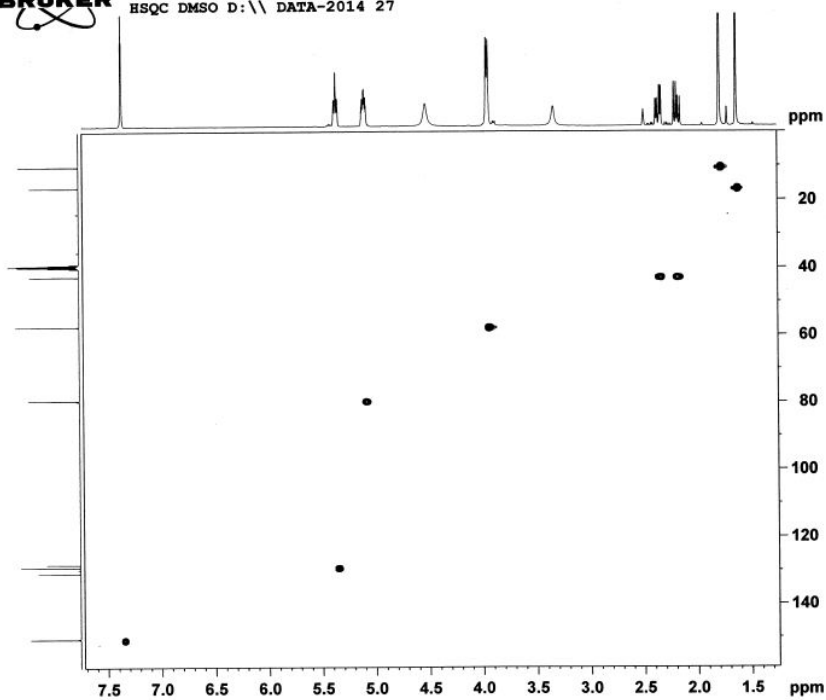

Current Data Parameters  
NAME 20140616 zhp-44  
EXPNO 4  
PROCNO 1

F2 - Acquisition Parameters  
Date\_ 20140617  
Time 7.23  
INSTRUM spect  
PROBHD 5 mm PABBO BB/  
PULPROG hsqcqtgssip.2  
TD 1024  
SOLVENT DMSO  
NS 16  
DS 16  
SWH 5597.015 Hz  
FIDRES 5.465835 Hz  
AQ 0.0914773 sec  
RG 194.76  
DW 89.333 usec  
DE 6.50 usec  
TE 298.1 K  
CNS12 145.0000000  
CNS17 1.0000000  
D0 0.00000300 sec  
D1 1.00000000 sec  
D4 0.00172414 sec  
D11 0.03000000 sec  
D16 0.00020000 sec  
D24 0.00110000 sec  
IN0 0.00002260 sec

CHANNEL f1  
SFO1 400.1324057 MHz  
NUC1 1H  
P1 10.20 usec  
P2 20.40 usec  
P28 1000.00 usec  
PLW1 14.45400047 W

CHANNEL f2  
SFO2 100.6228284 MHz  
NUC2 13C  
CPDPRG2 garp  
P3 10.05 usec  
P14 500.00 usec  
P24 2000.00 usec  
PCPD2 70.00 usec  
PLW0 0 W  
PLW2 69.38400116 W  
PLW12 1.50660002 W  
SPNAM[3] Crp60.0.5.20.1  
SFOAL3 0.500  
SFOFS3 0 Hz  
SPW3 10.80000019 W  
SPNAM[7] Crp60comp.4  
SFOAL7 0.500  
SFOFS7 0 Hz  
SPW7 10.80000019 W

Figure S36. The HSQC Spectrum of compound 4

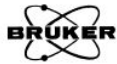

Bruker AVANCEIII 400 20140616  
H-H\_COSY\_MQF DMSO D:\\ DATA-2014 27

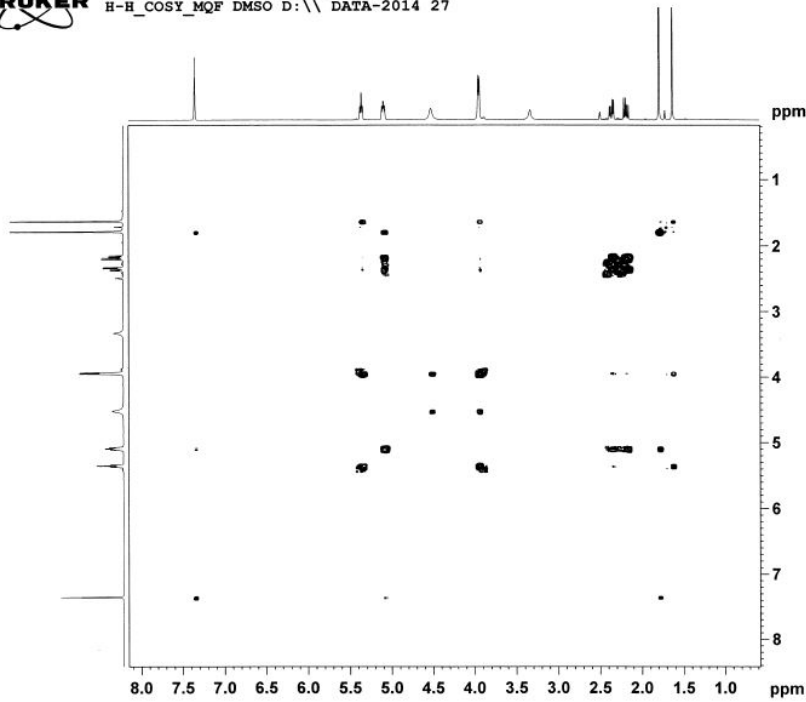

```
Current Data Parameters
NAME 20140616 zhp-44
EXPNO 6
PROCNO 1

F2 - Acquisition Parameters
Date_ 20140618
Time 8.39
INSTRUM spect
PROBHD 5 mm PABBO BB/
PULPROG cosygmqf
TD 2048
SOLVENT DMSO
NS 16
DS 16
SWH 5341.830 Hz
FIDRES 2.608340 Hz
AQ 0.1916928 sec
RG 194.76
DW 93.600 usec
DE 6.50 usec
TE 298.0 K
D0 0.00000300 sec
D1 2.00000000 sec
D13 0.00000400 sec
D16 0.00020000 sec
IN0 0.00018720 sec

----- CHANNEL f1 -----
SFO1 400.1324857 MHz
NUC1 1H
PI 10.20 usec
PLW1 14.45400047 W

----- GRADIENT CHANNEL -----
GPNAM[1] SMSQ10.100
GPNAM[2] SMSQ10.100
GPNAM[3] SMSQ10.100
GPZ1 16.00 %
GPZ2 12.00 %
GPZ3 40.00 %
P16 1000.00 usec

F1 - Acquisition parameters
TD 128
SFO1 400.1324 MHz
FIDRES 41.733440 Hz
SW 13.350 ppm
FqMODE QF

F2 - Processing parameters
SI 1024
SF 400.1300088 MHz
WDW SINE
SSB 0
LB 0 Hz
GB 0
PC 1.40

F1 - Processing parameters
SI 1024
MC2 QF
SF 400.1300000 MHz
```

Figure S37. The  $^1\text{H}$ ,  $^1\text{H}$ -COSY Spectrum of compound 4



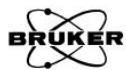

Bruker AVANCEIII 400 20140604 ZHP-44  
DEPT DMSO D:\ \ DATA-2014 13

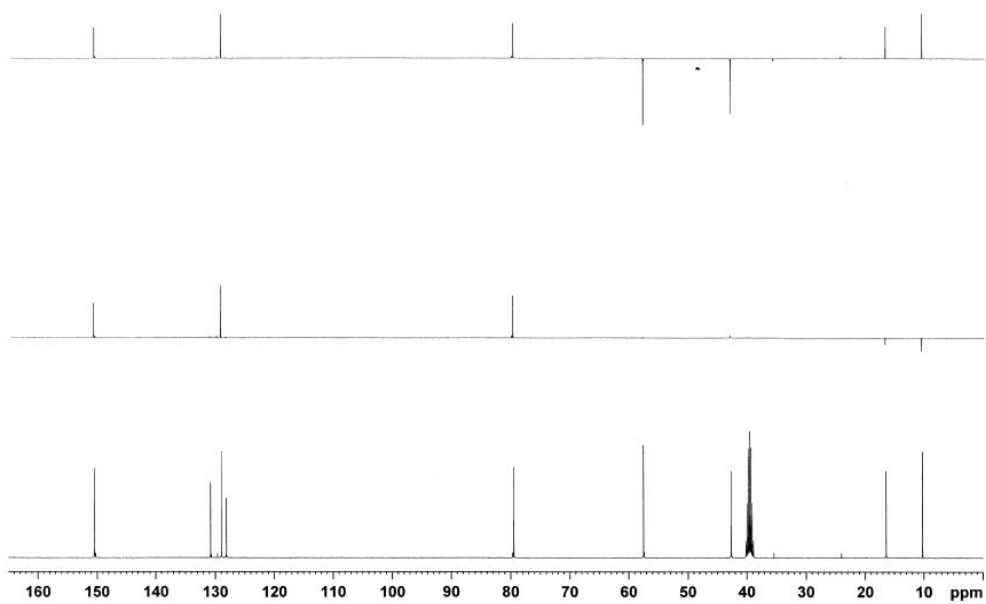

Figure S38. The HMBC Spectrum of compound 4

## MS Formula Results: + Scan (4.334 min) Sub (2014061603.d)

| m/z      | Ion                 | Formula                                          | Abundance |
|----------|---------------------|--------------------------------------------------|-----------|
| 205.0835 | (M+Na) <sup>+</sup> | C <sub>10</sub> H <sub>14</sub> NaO <sub>3</sub> | 1367869.5 |

  

| Best | Formula (M)                                    | Ion Formula                                      | Score | Cross Sco | Mass     | Calc Mass | Calc m/z | Diff (ppm) | Abs Diff (ppm) | Mass Match | Abund Match | Spacing Match | DBE |
|------|------------------------------------------------|--------------------------------------------------|-------|-----------|----------|-----------|----------|------------|----------------|------------|-------------|---------------|-----|
| ☑    | C <sub>10</sub> H <sub>14</sub> O <sub>3</sub> | C <sub>10</sub> H <sub>14</sub> NaO <sub>3</sub> | 99.99 |           | 182.0942 | 182.0943  | 205.0835 | 0.33       | 0.33           | 100        | 99.99       | 99.98         | 4   |

Figure S39. The HRESIMS Spectrum of compound 4

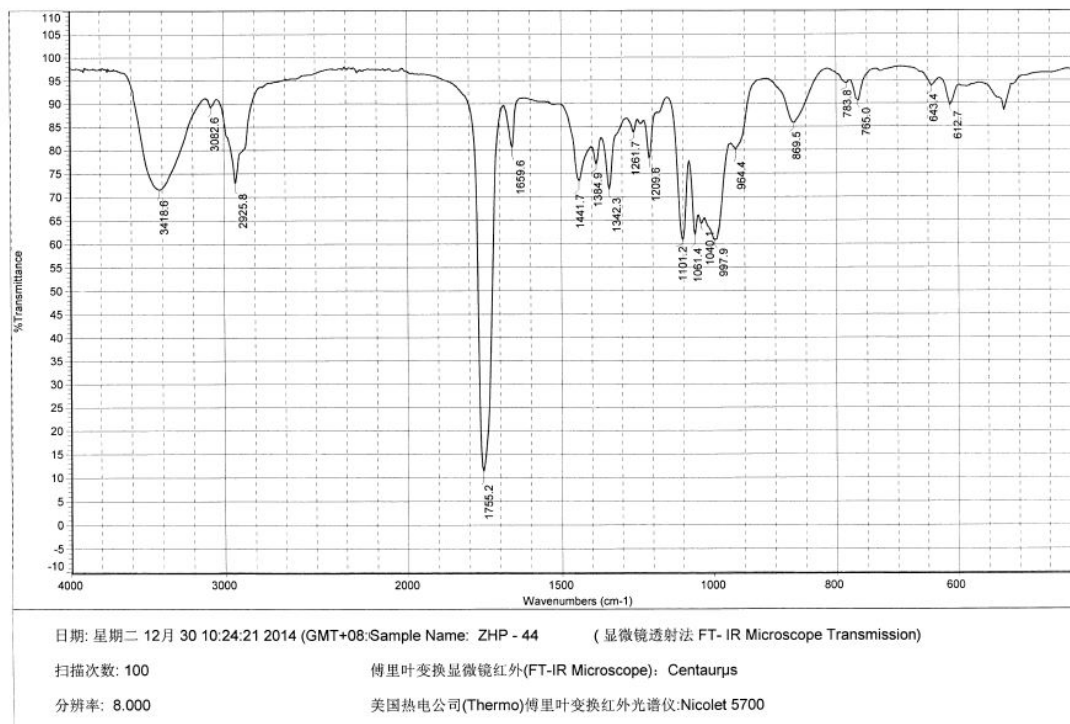

Figure S40. The IR Spectrum of compound 4

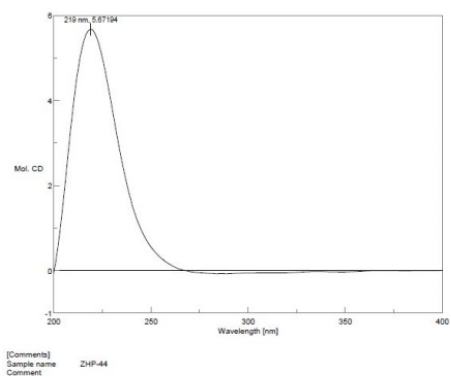

**Figure S41. The CD Spectrum of compound 4**

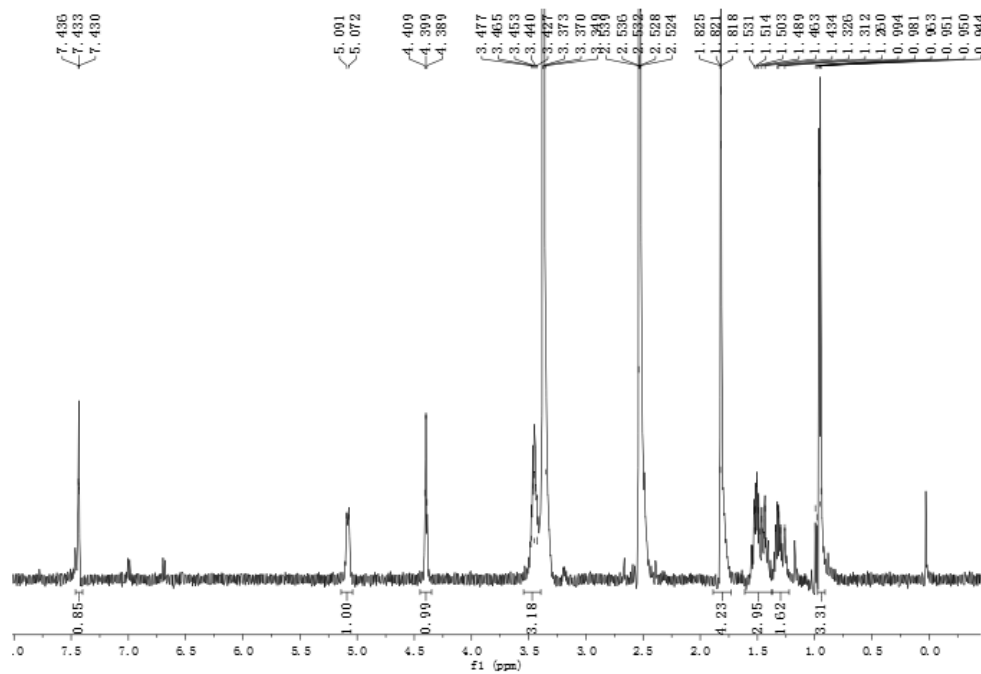

Figure S42. The  $^1\text{H}$  NMR Spectrum of compound 5 (600 MHz,  $\text{DMSO-}d_6$ )

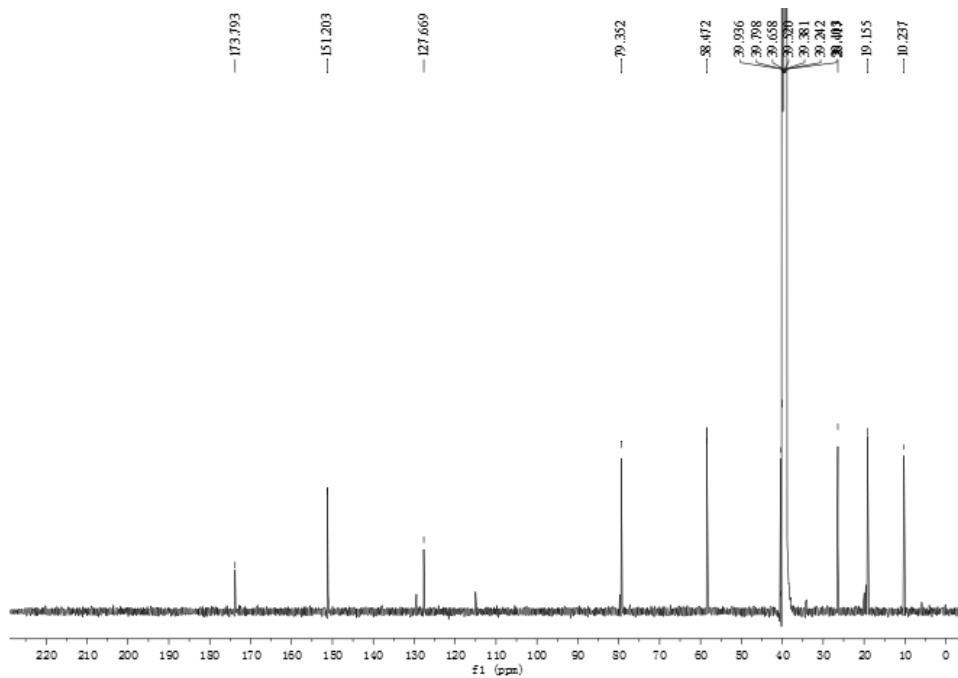

Figure S43. The  $^{13}\text{C}$  NMR Spectrum of compound 5 (150 MHz,  $\text{DMSO-}d_6$ )

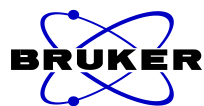

Bruker AVIIIHD 600 20150529  
DEPT DMSO D:\\ DATA2015 27

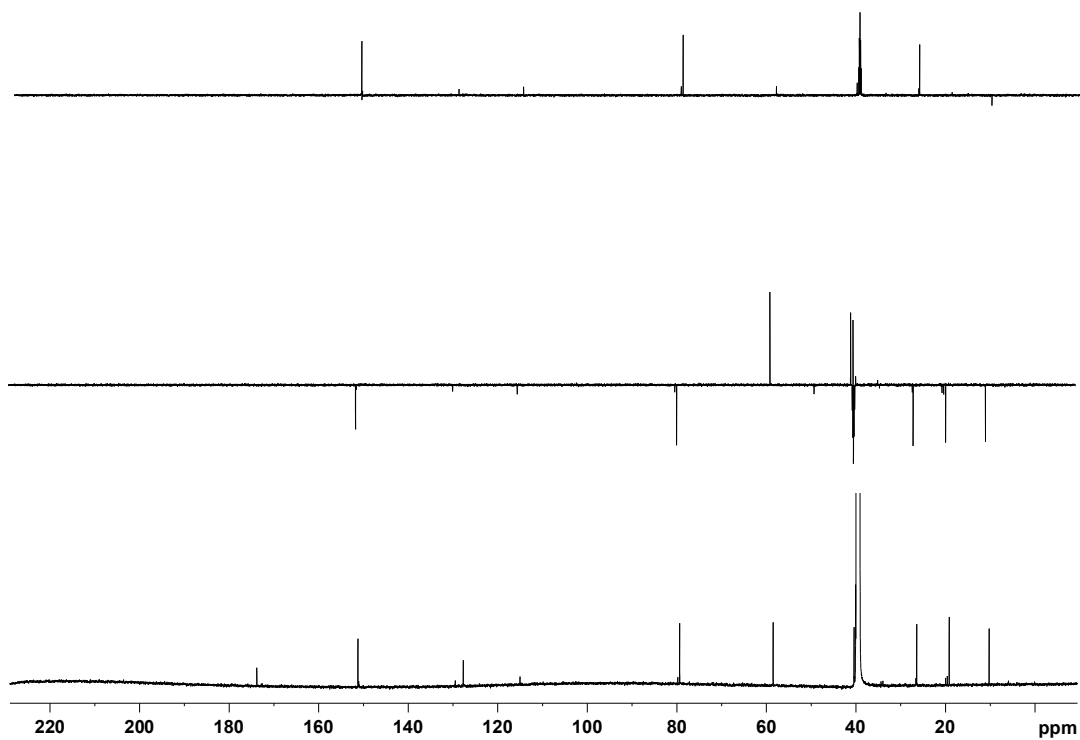

Figure S44. The DEPT Spectrum of compound 5

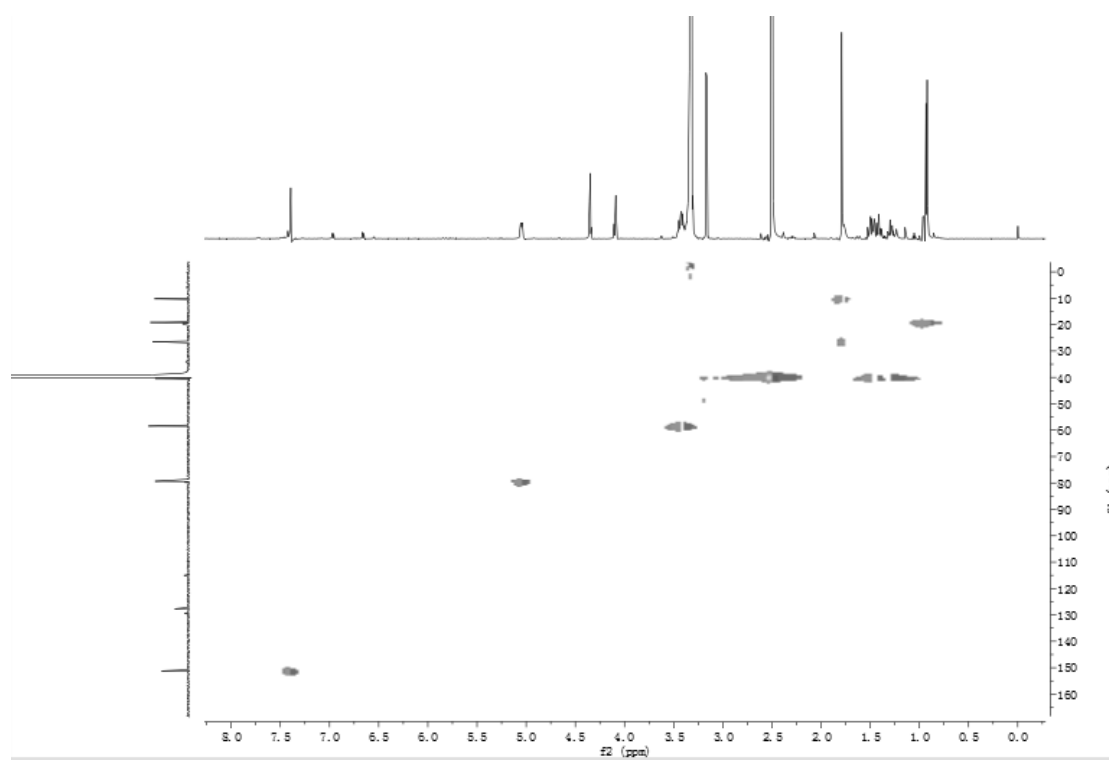

**Figure S45. The HSQC Spectrum of compound 5**



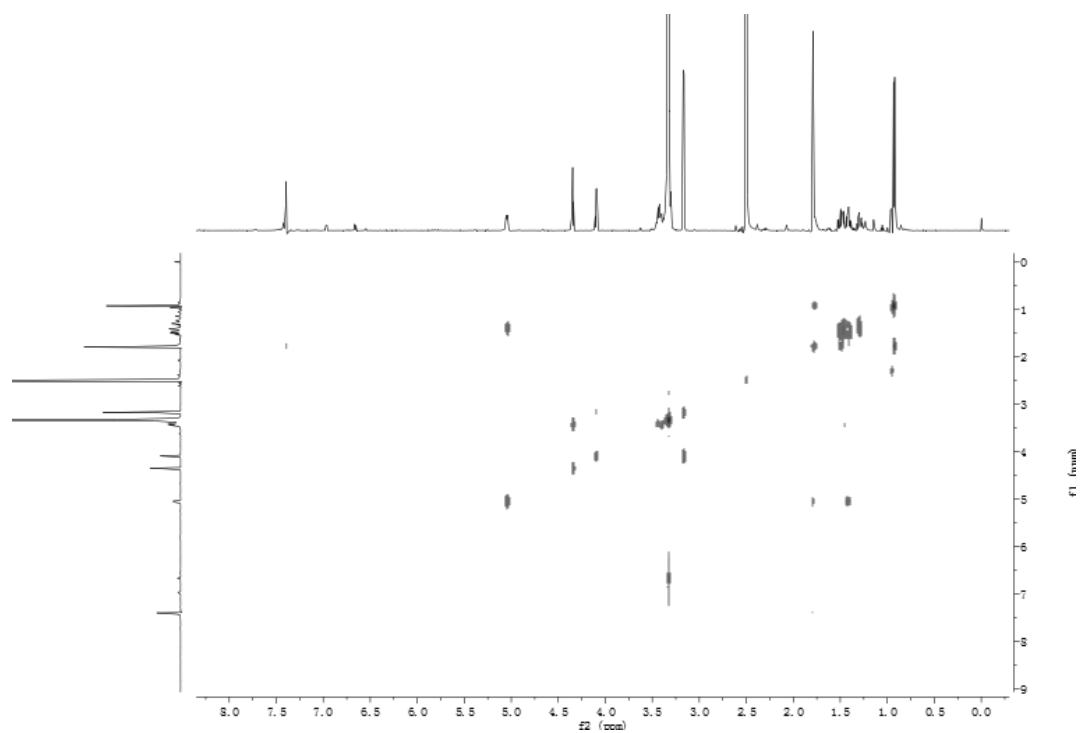

**Figure S46.** The  $^1\text{H}$ ,  $^1\text{H}$ -COSY Spectrum of compound 5

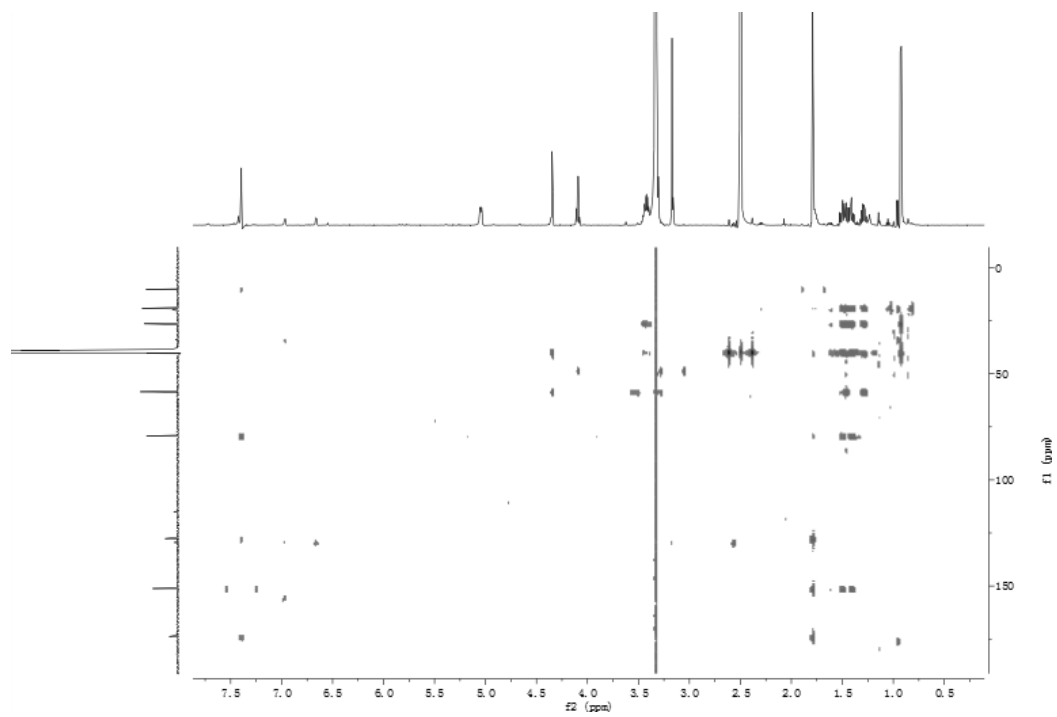

**Figure S47. The HMBC Spectrum of compound 5**

MS Formula Results: + Scan (4.882 min) Sub (2016031804.d)

| m/z      | Ion                 | Formula                                          | Abundance |
|----------|---------------------|--------------------------------------------------|-----------|
| 207.0993 | (M+Na) <sup>+</sup> | C <sub>10</sub> H <sub>16</sub> NaO <sub>3</sub> | 89198.8   |

  

| Best | Formula (M)                                    | Ion Formula                                      | Score | Cross Sco | Mass     | Calc. Mass | Calc. m/z | Diff (ppm) | Abn Diff (ppm) | Mass Match | Abund Match | Spacing Match | DBE |
|------|------------------------------------------------|--------------------------------------------------|-------|-----------|----------|------------|-----------|------------|----------------|------------|-------------|---------------|-----|
| ✓    | C <sub>10</sub> H <sub>16</sub> O <sub>3</sub> | C <sub>10</sub> H <sub>16</sub> NaO <sub>3</sub> | 97.42 |           | 184.1101 | 184.1099   | 207.0992  | -0.64      | 0.64           | 99.99      | 99.65       | 89.59         | 3   |

Figure S48. The HRESIMS Spectrum of compound 5

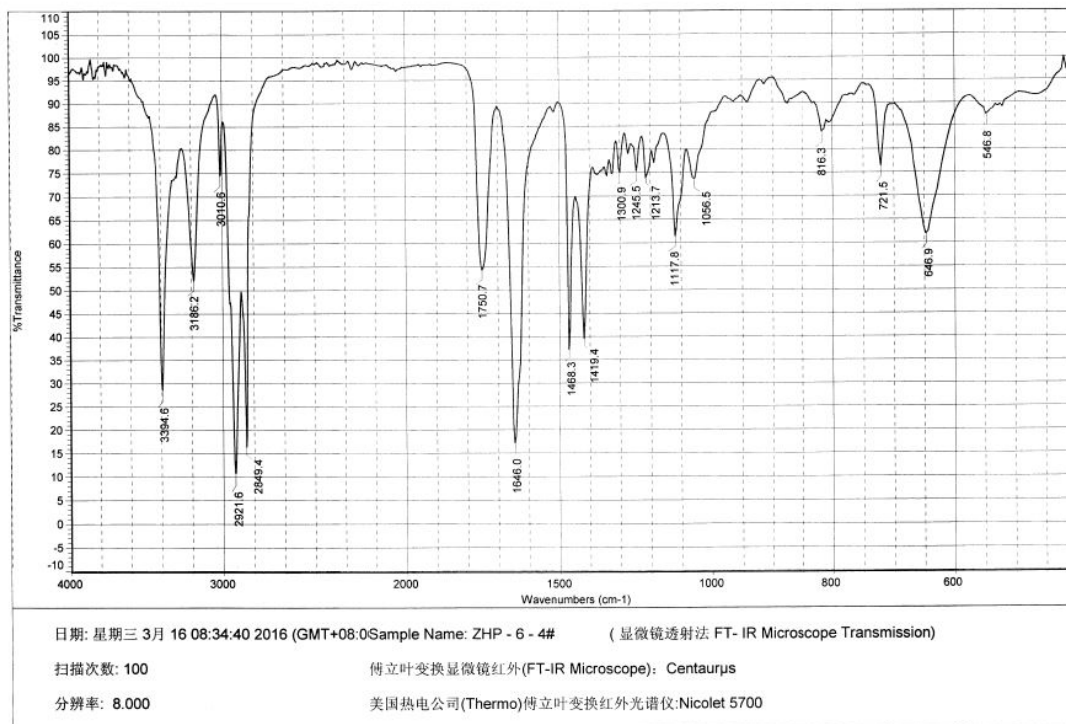

Figure S49. IR Spectrum of compound 5

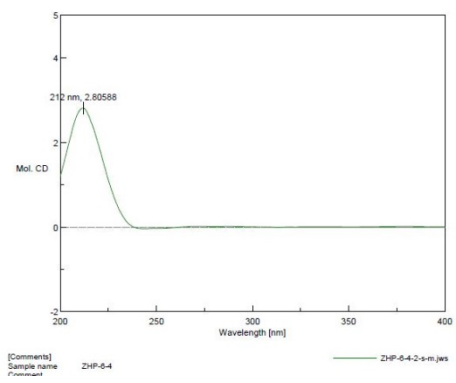

**Figure S50. CD Spectrum of compound 5**
